## Social and non-social autism symptom and trait domains are genetically dissociable

Varun Warri<sup>1,15</sup>, Roberto Toro<sup>2,3</sup>, Hyejung Won<sup>4</sup>, Claire S Leblond<sup>2,3</sup>, Freddy Cliquet<sup>2</sup>, Richard Delorme<sup>2,5</sup>, Ward De Witte<sup>6</sup>, Janita Bralten<sup>6,7</sup>, Bhismadev Chakrabarti<sup>1,8</sup>, Anders D Børglum<sup>9-11</sup>, Jakob Grove<sup>9-12</sup>, Geert Poelmans<sup>6</sup>, the 23andMe Research Team<sup>†</sup>, David A. Hinds<sup>13,16</sup>, Thomas Bourgeron<sup>2,3,14,16</sup>, and Simon Baron-Cohen<sup>1,15,16</sup>

<sup>1</sup>Autism Research Centre, Department of Psychiatry, University of Cambridge, Cambridgeshire, United Kingdom

<sup>2</sup>Institut Pasteur, Human Genetics and Cognitive Functions Unit, Paris, France

<sup>3</sup>CNRS UMR 3571: Genes, Synapses and Cognition, Institut Pasteur, Paris, France

<sup>4</sup>Department of Genetics, University of North Carolina, Chapel Hill, NC 27599, USA

<sup>5</sup>Child and Adolescent Psychiatry Department, Robert Debré Hospital, Paris, France

<sup>6</sup>Department of Human Genetics, Radboud University Medical Center, Nijmegen, The Netherlands

<sup>7</sup>Donders Institute for Brain, Cognition and Behaviour, Radboud University, Nijmegen, The Netherlands

<sup>8</sup>Centre for Integrative Neuroscience and Neurodynamics, School of Psychology and Clinical Language Sciences, University of Reading, Reading, United Kingdom

<sup>9</sup>The Lundbeck Foundation Initiative for Integrative Psychiatric Research, iPSYCH, Aarhus, Denmark

<sup>10</sup>Centre for Integrative Sequencing, iSEQ, Aarhus University, Aarhus, Denmark

<sup>11</sup>Department of Biomedicine - Human Genetics, Aarhus University, Aarhus, Denmark

<sup>12</sup>Bioinformatics Research Centre, Aarhus University, Aarhus, Denmark

<sup>13</sup>23andMe Inc., Mountain View, California 94043, USA

<sup>14</sup>Université Paris Diderot, Sorbonne Paris Cité, Human Genetics and Cognitive Functions, Paris, France

<sup>15</sup>**Corresponding authors:** Varun Warri<sup>†</sup> ([vw260@medschl.cam.ac.uk](mailto:vw260@medschl.cam.ac.uk)) and Simon Baron-Cohen ([sb205@cam.ac.uk](mailto:sb205@cam.ac.uk)). Autism Research Centre, Department of Psychiatry, Cambridge University, Douglas House, 18B Trumpington Road, Cambridge, CB2 8AH, United Kingdom. Telephone: 0044 (0) 1223 746057.

<sup>16</sup>Joint senior authors.

<sup>†</sup>A full list of consortium members appears at the end of the paper.

## **Abstract**

The core diagnostic criteria for autism comprise two symptom domains – social and communication difficulties, and unusually repetitive and restricted behaviour, interests and activities. There is some evidence to suggest that these two domains are dissociable, yet, this hypothesis has not been tested using molecular genetics. We test this using a GWAS of a non-social autistic trait, systemizing (N = 51,564), defined as the drive to analyse and build systems. We demonstrate that systemizing is heritable and genetically correlated with autism. In contrast, we do not identify significant genetic correlations between social autistic traits and systemizing. Supporting this, polygenic scores for systemizing are significantly positively associated with restricted and repetitive behaviour but not with social difficulties in autistic individuals. These findings strongly suggest that the two core domains of autism are genetically dissociable, and point at how to fractionate the genetics of autism.

## 1 **Introduction**

2           The core diagnostic criteria of autism comprises two symptom domains: difficulties in  
3 social interactions and communication (the social domain) and unusually repetitive and  
4 restricted behaviour and stereotyped interests (the non-social domain)<sup>1</sup>. Multiple lines of  
5 evidence suggest that these two domains are dissociable<sup>2,3</sup>. First, factor and principal  
6 component analysis of autism and autistic traits have mostly identified two factors for autism  
7 – a social and a non-social factor<sup>4-9</sup>. Second, investigation of autistic traits in large cohorts  
8 have demonstrated a positive phenotypic correlation between different social traits and  
9 different non-social traits separately, but only a limited correlation between social and non-  
10 social traits<sup>9-12</sup>. Third, twin genetic correlations between social and non-social symptom  
11 domains in autism are low, though both social and non-social trait domains are highly  
12 heritable in neurotypical<sup>13,14</sup> or autistic twins<sup>15</sup>. Fourth, difficulties in social and non-social  
13 domains can occur independently of each other<sup>16,17</sup>, which has been used to subgroup  
14 individuals on the spectrum based on the two domains<sup>18</sup>. This suggests that the genetic and  
15 phenotypic architecture of autism consists of at least two categories of broadly dissociable  
16 domains. This has implications for genetic, biological, and clinical studies of autism, since  
17 most studies have investigated autism as if it is a unitary condition<sup>3</sup>. The idea that social and  
18 non-social symptom domains are dissociable is unsurprising given their very different nature,  
19 and very different underlying cognitive processes one related to interpreting animate motion  
20 and mental states (theory of mind) and the other related to recognizing inanimate objects,  
21 events or patterns (systemizing), or their very different underlying neurology<sup>3</sup>. Nevertheless,  
22 the traditional view of autism is that it is a syndrome, meaning the diagnosis is only given  
23 when the social and non-social symptom domains cluster together.

24           However, to date, there has been limited molecular genetic evidence in support of  
25 this dissociability hypothesis, partly due to the limited large-scale research on the genetics of  
26 social and non-social domains. Most genetic research into the social and non-social domains  
27 has been primarily through linkage and genome-wide association studies (GWAS) in  
28 relatively small samples of autistic individuals and the general population ( $N < 5K$ )<sup>19-25</sup>. This  
29 has precluded a detailed molecular genetic investigation of the social and non-social domains  
30 associated with autism. Given currently available sample sizes with phenotypic information,  
31 investigating the genetics of the social and non-social domains in autistic individuals is  
32 difficult. However, several studies have demonstrated that the underlying liability for autism  
33 is normally distributed in the general population<sup>26-29</sup>. Factor analysis have failed to identify

34 discontinuities between clinical autism and autistic traits in the general population<sup>30</sup>. Autistic  
35 traits are heritable<sup>31–33</sup>, are elevated in family members of autistic individuals compared to the  
36 general population<sup>34,35</sup>, and are transmitted intergenerationally<sup>36,37</sup>. Factor analysis of autistic  
37 traits measures have also identified two different factors in both the general population and  
38 autistic individuals – one linked to the social domain, and another linked to the non-social  
39 domain, mirroring the factor structure of clinical autism domains<sup>6,9,30,38</sup>. Studies have further  
40 demonstrated moderate to high shared genetics between the extremes of the liability  
41 distribution and the rest of the distribution<sup>14,39–41</sup>. One twin study investigated the bivariate  
42 genetic correlation between research and clinical autism diagnosis and autistic traits and  
43 identified high genetic correlations ( $0.7 < r_g < 0.89$ )<sup>42</sup>. Validating this, studies have identified  
44 modest shared genetics between autism and autistic traits<sup>43–45</sup>. Taken together, there is  
45 considerable evidence to suggest that autism represents the extreme end of the autistic traits  
46 continuum.

47 While a few studies have investigated the genetics of traits contributing to the social  
48 domains such as social and communications difficulties<sup>19,44,45</sup>, empathy<sup>46</sup>, and emotion  
49 recognition<sup>47</sup>, there have been limited studies investigating the genetics of the non-social  
50 domain<sup>25,48</sup>. Neither of these studies have replicably identified significant variants associated  
51 with the non-social domain, primarily because of the relatively modest sample sizes of the  
52 GWAS. An alternate approach is to investigate the genetics of non-social autistic traits in the  
53 typical population, maximizing the sample size. To better understand the genetics of a non-  
54 social autistic trait, we investigate the genetics of systemizing measured using a 75-item well  
55 validated self-report measure called the Systemizing Quotient-Revised (SQ-R) (**Methods**).  
56 Systemizing involves identifying *input-operation-output* relationships in order to analyse and  
57 build systems, and to understand the laws that govern specific systems<sup>49</sup>. The hyper-  
58 systemizing theory of autism proposes that autistic individuals, on average, have superior  
59 attention to detail, and a stronger drive to systemize<sup>49</sup>. This has been validated in several  
60 studies<sup>50,51</sup> including a recent study in more 650,000 individuals including 36,000 autistic  
61 individuals<sup>12</sup>. Several lines of evidence suggest that autistic individuals have intact or  
62 superior systemizing. The idea was noted in the earliest papers describing autism by both  
63 Hans Asperger<sup>52</sup> and Leo Kanner<sup>53</sup>. Further, autistic adults, on average, score higher on the  
64 SQ-R compared to individuals in the general population<sup>10,51</sup>, a pattern also observed in  
65 autistic children<sup>54</sup>. Several items in the SQ-R specifically measures circumscribed interests  
66 and insistence on sameness, two of the items mentioned in the DSM-5, and several of these

67 items map onto items on the Autism Spectrum Quotient (AQ), a well validated measure of  
68 autistic traits<sup>27</sup> (**Supplementary Note**). Because systems follow rules, they repeat, such that  
69 an operation on a given input produces the same output every time. A fascination with  
70 systems may thus manifest as unusually repetitive behaviour. And because systems depend  
71 on precise variables, a fascination with systems may also manifest as unusually narrow  
72 interests in autism.

73 The present study has two aims: 1. To investigate the polygenic architecture of a non-  
74 social trait linked to autism: *systemizing*, and 2. To investigate if social and non-social autistic  
75 traits measured in the general population are genetically dissociable.

76

## 77 **Results**

78 We first conducted a GWAS of systemizing (N = 51,564) measured using the SQ-R.  
79 Following this, and using data from GWAS of social traits genetically correlated with autism  
80 (GWAS of self-reported empathy (N = 46,861)<sup>46</sup>, and GWAS of social relationship  
81 satisfaction<sup>55</sup> measured using friendship (N<sub>effective</sub> = 164,112) and family relationship (N<sub>effective</sub>  
82 =158,116) satisfaction scales) we investigated if the social and non-social domains autistic  
83 traits are genetically dissociable in the general population. A flow-chart of the study design is  
84 provided in **Figure 1**.

85 *Insert Figure 1 here*

86 Systemizing was measured in the 23andMe sample (N = 51,564) using scores from  
87 the SQ-R<sup>10</sup>. Scores on SQ-R were normally distributed, with a mean of 71±21 out of 150. As  
88 hypothesized based on previous research<sup>10,12,51</sup>, males (76.5±20), on average, scored higher  
89 than females (65.4±20.6) (P < 0.001, Cohen's d = 0.54, **Supplementary Figure 1**). Given the  
90 significant sex differences in scores, we conducted a non-stratified and sex-stratified GWAS  
91 for SQ-R. Genome-wide association analyses identified three significant loci (**Figure 2**,  
92 **Supplementary Table 1** and **Supplementary Figure 2**). Two of these were significant in the  
93 non-stratified GWAS: rs4146336 on chromosome 3 (P = 2.58x10<sup>-8</sup>) and rs1559586 on  
94 chromosome 18 (P = 4.78x10<sup>-8</sup>). The third significant locus was in the males-only GWAS  
95 (rs8005092 on chromosome 14, P = 3.74x10<sup>-8</sup>). rs8005092 and rs1559586 lie in regions of  
96 high genetic recombination. Linkage-Disequilibrium Score Regression (LDSR) intercept  
97 suggested that there was minimal inflation due to population stratification (**Figure 2**). Fine-

98 mapping of the three regions identified 14 credible SNPs (**Methods**). None of the SNPs  
99 overlapped with foetal brain eQTL. However, two of these SNPs mapped onto two genes -  
100 *LSAMP* and *PTMAP8*, both of chromosome 3 - using chromatin interaction data in the foetal  
101 brain. Of these, *LSAMP* is a neuronal adhesion molecule in the limbic system of the  
102 developing brain. Additionally, gene-based analysis identified 4 significant genes *SDCCAG8*,  
103 *ZSWIM6*, *ZNF574* and *FUT8* (**Supplementary Table 2**). Of these, mutations in *ZSWIM6*  
104 cause a neurodevelopmental disorder with, in some cases, co-morbid autism and unusually  
105 repetitive movements and behaviour<sup>56</sup>. As supporting analyses, we investigated the direction  
106 of effect for all independent SNPs with  $P < 1 \times 10^{-6}$  in the non-stratified SQ-R GWAS in  
107 GWAS of autism<sup>57</sup>, educational attainment<sup>58</sup>, and cognitive aptitude<sup>59</sup>. Five out of six SNPs  
108 tested had concordant effect in the GWAS for educational attainment and GWAS for  
109 cognitive aptitude ( $P = 0.21$ , two-sided binomial sign test for each comparison). Similarly,  
110 four out of five SNPs tested had concordant effect direction in the GWAS for autism  
111 (**Supplementary Table 3a**) ( $P = 0.37$ , two-sided binomial sign test). For these three  
112 phenotypes, we additionally assessed effect direction concordance using binomial sign test at  
113 less stringent P-value thresholds in the SQ-R GWAS, after LD-based clumping ( $P < 1, 0.5,$   
114  $0.1$  and  $1 \times 10^{-4}$ ). Binomial sign test was statistically significant at three of the four P-value  
115 thresholds ( $P = 1, 0.5$  and  $0.1$ ) for all three phenotypes but not statistically significant at  $P =$   
116  $1 \times 10^{-4}$ , presumably due to the low statistical power (**Supplementary Table 3b**). Additionally,  
117 we tested effect direction concordance ( $P < 1 \times 10^{-6}$ ) in a GWAS ( $N = 1,981$ ) of ‘insistence  
118 on sameness’, a phenotype that’s similar to systemizing (**Methods**). Four out of five SNPs  
119 had a concordant effect direction including the two SNPs with  $P < 5 \times 10^{-8}$  in the non-stratified  
120 SQ-R GWAS ( $P = 0.37$ , two-sided binomial sign test).

121 *Insert Figure 2 here*

122 Additive SNP-based heritability ( $h^2_{\text{SNP}}$ ) calculated using LDSR was  $0.12 \pm 0.012$  for  
123 the SQ-R ( $P = 1.2 \times 10^{-20}$ ). Despite small but significant sex-differences in the SQ-R scores,  
124 there was no significant difference in  $h^2_{\text{SNP}}$  between males and females ( $P = 0.34$ )  
125 (**Supplementary Figure 3 and Supplementary Table 4**), which was strengthened by the  
126 high genetic correlation between males and females ( $1 \pm 0.17$ ;  $P = 3.91 \times 10^{-10}$ ), suggesting a  
127 similar polygenic architecture between sexes. The per-SNP effect for the most significant  
128 SNPs was small, suggesting a highly polygenic architecture ( $R^2 = 0.001 - 0.0002\%$ , after  
129 correcting for winner’s curse, **Supplementary Table 5**).

130 Partitioned heritability for functional categories identified significant enrichment for  
131 evolutionary conserved regions, transcription start sites, foetal DNase hyper-sensitivity sites,  
132 and H3 lysine 27 acetylation (H3K27ac), suggesting a prominent role for regulatory and  
133 conserved genomic regions in systemizing (**Supplementary Table 6**). Partitioning  
134 heritability based on tissue specific active chromatin marks identified a significant  
135 enrichment for brain specific chromatin signatures highlighting the role of the brain for the  
136 SQ-R. Notably, this enrichment was significant in both adult and foetal brain specific active  
137 chromatin marks (**Supplementary Table 7 and Supplementary Figure 4**). Enrichment for  
138 genes expressed in the brain was high but failed to reach statistical significance after  
139 correcting for the multiple tests conducted (**Supplementary Figure 5 and Supplementary**  
140 **Table 8**).

141 We identified a significant positive genetic correlation between the SQ-R and autism  
142 as well as measures of intelligence (cognitive aptitude and educational attainment)  
143 (**Supplementary Table 9 and Figure 3a**). Of all the psychiatric conditions tested  
144 (**Methods**), SQ-R was only significantly genetically correlated with autism ( $r_g = 0.26 \pm 0.06$ ;  $P$   
145  $= 3.35 \times 10^{-5}$ ), demonstrating the relative specificity of the SQ-R to autism. Notably, the effect  
146 size of the genetic correlation between autism and the SQ-R is similar to the genetic  
147 correlation between autism and self-reported empathy (measured using the Empathy Quotient  
148 (EQ<sup>60</sup>):  $r_g = -0.27 \pm 0.07$ ) and scores on the Social and Communication Disorders Checklist  
149 (SCDC<sup>61</sup>):  $r_g = 0.27 \pm 0.13$ ). Controlling for the genetic effects of educational attainment on  
150 the SQ-R GWAS using genome-wide inferred statistics (GWIS) (**Methods**) attenuated the  
151 genetic correlation with autism only modestly, suggesting that the SQ-R scores are  
152 genetically correlated with autism independently of the genetic effects of education (**Figure**  
153 **3b and Supplementary Table 10**). We validated this using genomic structural equation  
154 modeling (GSEM) (**Methods**) using both educational attainment and cognitive aptitude  
155 (**Figure 3c**). Further, the SQ-R was not genetically correlated with any of the social measures  
156 related to autism – friendship and family relationship satisfaction, scores on a self-report  
157 measure of empathy - the Empathy Quotient (EQ), and the scores on the Social and  
158 Communication Disorders Checklist (SCDC), which is a measure of social and  
159 communication difficulties (see **Supplementary Note** for how these traits map onto social  
160 domains in autism). Estimates of genetic correlations between SQ-R scores and the various  
161 social traits are also small, suggesting that there is limited shared genetics between social  
162 autism traits and the SQ-R.



163

*Insert Figure 3 here*

164 To understand the genetic relationship between the SQ-R and autism in a broader  
165 context, we evaluated the genetic correlations between multiple phenotypes with evidence of  
166 significant genetic correlation with autism (15 phenotypes in total, see **Methods** for a list of  
167 phenotypes included). Clustering highlighted three broad clusters: a social cluster, a  
168 psychiatric cluster, and an intelligence cluster (**Figure 4a and Supplementary Tables 11**  
169 **and 12**). The SQ-R clusters closely with measures of intelligence, but while educational  
170 attainment and cognitive aptitude are significantly correlated with multiple social traits and  
171 psychiatric conditions, the SQ-R is only genetically correlated with autism.

172 Given that the two major domains of autism as identified by the DSM-5 are persistent  
173 difficulties in social interaction and communication and unusually restrictive, stereotyped,  
174 and repetitive interests<sup>1</sup>, we hypothesized that the combination of significant negative genetic  
175 correlation with social traits (friendship satisfaction and empathy) and significant positive  
176 genetic correlation with SQ-R is uniquely associated with autism (**Methods**). Indeed, across  
177 the nine psychiatric conditions for which we had summary GWAS statistics, this combination  
178 was uniquely seen for autism (**Figure 4b, Supplementary Table 13**).

179

*Insert Figure 4 here*

180 Given that our current analysis focussed on the general population, we sought to  
181 investigate if polygenic scores from the SQ-R were associated with social and non-social  
182 autism domains in 2,221 autistic individuals from the Simons Simplex Collection (**Methods**).  
183 We hypothesized that SQ-R may be significantly associated with the non-social domain in  
184 autism, but not associated with the social domain in autism. Polygenic scores for SQ-R were  
185 significantly associated with scores on the Repetitive Behaviour Scale-Revised (Beta =  
186  $0.052 \pm 0.02$ ,  $P = 0.013$ ), but not on the social and communication subscale of ADOS-G (Beta  
187 =  $-0.00099 \pm 0.018$ ,  $P = 0.95$ ) after adjusting for multiple test (Bonferroni alpha = 0.025). We  
188 validated this in 426 additional individuals of which 401 had a diagnosis of autism with RBS-  
189 R scores from the EU-AIMS LEAP, AGRE, and Paris cohorts. Here, we identified a  
190 concordant effect direction for polygenic score of the SQ-R (Beta =  $0.02 \pm 0.05$ ,  $P = 0.65$ ),  
191 though the results were not significant potentially due to the small sample size. Inverse-  
192 variance meta-analysis of the discovery and the validation cohorts marginally improved the  
193 significance of the association (Beta =  $0.047 \pm 0.018$ ,  $P = 0.010$ ), and the results remained  
194 statistically significant (Bonferroni alpha = 0.025). In a separate sample of 475 autistic



195 individuals from the AGRE cohort, polygenic scores for the SQ-R were not associated with  
196 the social and communication subscale of ADOS-G (Beta =  $-0.046 \pm 0.04$ ,  $P = 0.24$ ). Meta-  
197 analysis of the two cohorts did not produce a statistically significant result (Beta = -  
198  $0.008 \pm 0.016$ ,  $P = 0.60$ ) (see **Power calculations in the Supplementary Note**). We note that  
199 the lack of association between the polygenic scores for the SQ-R and the ADOS-G social  
200 and communication subscale is not indicative of absence of shared genetics, but rather  
201 indicative of lower shared genetics than between the RBS-R and the SQ-R.

202 Finally, to further validate the results in autistic individuals, we conducted bivariate  
203 genetic correlations on scores on the RBS-R and the ADOS-G social and communication  
204 subscale in 2,989 individuals from the SSC, AGRE, EU-AIMS LEAP and Paris cohorts  
205 (2964 autistic individuals). Both the RBS-R ( $h^2_{\text{SNP}} = 0.11 \pm 0.11$ ,  $P = 0.15$ ) and the ADOS-G  
206 social and communication subscale ( $h^2_{\text{SNP}} = 0.26 \pm 0.10$ ,  $P = 0.004$ ) had modest  $h^2_{\text{SNP}}$ , though  
207 only the latter was statistically significant. We identified a small genetic correlation ( $r_g =$   
208  $0.15 \pm 0.46$ ,  $P = 0.74$ ), which was not statistically different from 0. Given the small sample  
209 size, the genetic correlation is unlikely to be statistically significant. However, the effect was  
210 small and statistically less than 1 ( $P = 0.034$ , One-tailed T test).

## 211 **Discussion**

212 We present the largest GWAS of a non-social trait related to autism in the general  
213 population – systemizing, measured using the SQ-R. We demonstrate that systemizing is  
214 heritable and genetically correlated with autism. Associated loci are enriched in genomic  
215 regions containing brain chromatin signatures and we identify three genome-wide significant  
216 loci, but these must be replicated in an independent cohort. Despite the modest sample size,  
217 our GWAS is well-powered to investigate genetic correlations between various phenotypes  
218 including social traits related to autism, as the Z-score of the  $h^2_{\text{SNP}}$  is above the recommended  
219 threshold of four<sup>62</sup>. We identify high sign concordance of the top SNPs in genetically  
220 correlated traits, enrichment for active chromatin marks in foetal and adult brain, and  
221 significant polygenic score association with the RBS-R. Polygenic score analysis suggests  
222 that the shared genetics between systemizing and the non-social domain in autism is  
223 considerably higher than the shared genetics between systemizing and the social domain. In  
224 addition, using a smaller sample of autistic individuals, we provide preliminary evidence that  
225 the social and non-social domains in autistic individuals have low shared genetics. Our results

226 highlight the need to collect deeper clinical and cognitive information in autistic individuals  
227 to better understand the phenotypic heterogeneity in autism.

228 Most studies model autism, and the underlying liability measured as autistic traits, as  
229 a single domain. This has likely arisen because of the difficulties in recruiting and  
230 phenotyping sufficient numbers of autistic people. Our study suggests that, both in the  
231 general population and in autistic individuals, social and non-social autistic traits and  
232 symptom domains are genetically dissociable. This may to some extent explain why,  
233 compared to GWAS of other psychiatric conditions of roughly similar sample sizes<sup>57,63–65</sup>,  
234 GWAS of autism to date have identified fewer loci. One possible explanation is statistical  
235 signal-attenuation because of the underlying heterogeneity. However, this does not  
236 necessarily suggest that systemizing, or the other individual trait domains are less complex.  
237 For instance, we observe similar  $h^2_{\text{SNP}}$  for SQ-R, self-reported empathy<sup>46</sup>, and the largest and  
238 most recent GWAS of autism<sup>57</sup>

239 It is important to investigate if these domains are dissociable in a larger cohort of  
240 autistic individuals and identify potential convergence of the two domains in gene expression  
241 networks in the developing brain. Our results confirm the need to rethink our understanding  
242 of autism as existing along a single dimension<sup>3,66</sup>. We hypothesize that the dissociation of the  
243 two domains will extend to these other research modalities in studies of autism and autistic  
244 traits. It is important to note that, while our results demonstrate two broadly dissociable  
245 autistic trait domains in the general population and in autistic individuals, more research is  
246 needed to identify other potentially dissociable domains and to investigate if this  
247 dissociability is driven by different designs of phenotypic instruments. For example, our  
248 research does not make a distinction between communication vs. social interaction abilities,  
249 or between sensory difficulties vs. repetitive behaviours, and future molecular genetic studies  
250 may identify varying levels of overlap between these domains. The same principle applies to  
251 other research modalities (neuroimaging, cognitive studies, hormonal assays, etc.,)  
252 investigating the biology of autism and autistic traits. These different symptom domains of  
253 autism may contribute to different co-morbidities. Our results identify shared genetics  
254 between the social autistic traits and psychiatric conditions such as schizophrenia and  
255 depression, but limited shared genetics between the SQ-R and these conditions. This needs to  
256 be evaluated epidemiologically.

## 257 **Methods**

258 *Participants:* The current study included participants from 23andMe (Primary GWAS - SQ-  
259 R), from ALSPAC (GWAS of scores on the Social and Communication Disorders Checklist  
260 (SCDC)) and autistic individuals from the Simons Simplex Collection (SSC), the Autism  
261 Genetic Resource Exchange (AGRE), and the EU-AIMS LEAP and PARIS cohorts.

262 *23andMe:* Research participants in the GWAS of the SQ-R were from 23andMe and  
263 are described in detail elsewhere<sup>67,68</sup>. All participants provided informed consent and  
264 answered surveys online according to a human subjects' research protocol, which was  
265 reviewed and approved by Ethical & Independent Review Services, an external AAHRPP-  
266 accredited private institutional review board (<http://www.eandireview.com>). All participants  
267 completed the online version of the SQ-R on the 23andMe participant portal. Only  
268 participants who were primarily of European ancestry (97% European Ancestry) were  
269 selected for the analysis using existing methods<sup>69</sup>. Unrelated individuals were selected using  
270 a segmental identity-by-descent algorithm<sup>70</sup>. A total of 51,564 participants completed the SQ-  
271 R (males = 26,063, and females = 25,501).

272 *ALSPAC:* ALSPAC is a longitudinal cohort which recruited pregnant mothers in the  
273 Avon region of the UK. The ALSPAC cohort comprises 14,541 initial pregnancies from  
274 women in Avon resulting in a total of 13,988 children who were alive at 1 year of age.  
275 Children were enrolled in additional phases, described in greater detail elsewhere<sup>71</sup>. This  
276 study received ethical approval from the ALSPAC Law-and-Ethics Committee, and the  
277 Cambridge Human Biology Research Ethics Committee. Written informed consent was  
278 obtained from parent or a responsible legal guardian for the child to participate. Assent was  
279 obtained from the child participants where possible. We conducted a GWAS of scores on the  
280 SCDC in 5,421 individuals from ALSPAC.

281 *Other cohorts:* We included data from four cohorts to conduct polygenic score and  
282 bivariate genetic correlation analysis. The SSC (n = 2,221 unrelated autistic individuals)  
283 consists of simplex autistic families, and are described elsewhere<sup>72</sup>. The AGRE cohort (n =  
284 482 unrelated autistic individuals) consists of multiplex autism families, details of which are  
285 provided elsewhere<sup>73</sup>. Across all cohorts, all participants were of European ancestry as  
286 identified using multi-dimensional scaling. Additionally, we included 401 individuals  
287 (including 25 neurotypical individuals) from the EU-AIMS LEAP<sup>74</sup> and Paris<sup>75</sup> cohorts.  
288 Across all cohorts, we included only unrelated individuals, who were predominantly of

289 European Ancestry as defined by genetic principal components (5 SD deviations above or  
290 below the mean European PC1).

291 Additionally, we also included data from 1,981 unrelated individuals (1000 males,  
292 1981 females) from the Nijmegen Biomedical Study (NBS) to provide support for the  
293 independent SNPs with  $P < 1 \times 10^{-6}$  in the non-stratified GWAS. Participants were asked the  
294 question: “It upsets me if my daily routine is disturbed”, which is related to a non-social  
295 domain of autism, and is similar to an item in the Autism Spectrum Quotient. Further  
296 information including genotyping and quality control is provided elsewhere<sup>43</sup>. Genetic  
297 association for the top SNPs were conducted using age, sex, and the first five genetic  
298 principal components as covariates using linear regression.

299 *Phenotypes:* The primary phenotype for this study is the SQ-R, which was used to conduct a  
300 GWAS in participants from 23andMe. The SQ-R is self-report measure of systemizing drive,  
301 or interest in rule-based patterns<sup>10</sup>. The SQ-R taps a variety of domains of systemizing, such  
302 as interest in mechanical (e.g., car engines), abstract (e.g., mathematics), natural (e.g., the  
303 weather), motor (e.g., knitting), and collectible (e.g., stamp collecting) systems. There are 75  
304 items on the SQ-R, with a maximum score of 150 and a minimum score of 0. Scores on the  
305 test are normally distributed<sup>10</sup>. The SQ-R has good cross-cultural stability and good  
306 psychometric properties with Cronbach’s alpha ranging from 0.79 to 0.94 in different  
307 studies<sup>76</sup>. Test-retest reliability available in a Dutch sample indicated high reliability of 0.79  
308 (Pearson correlation)<sup>76</sup>. This was supported by another study in 4,058 individuals which  
309 identified high internal cohesion<sup>77</sup>. Exploratory followed by confirmatory factor analysis  
310 using Rasch modelling suggests that the SQ-R is unidimensional<sup>77</sup>. A sex difference has been  
311 observed in multiple studies with males, on average, scoring significantly higher than  
312 females<sup>10,51</sup>. Criterion validity shows that the SQ-R has a modest but significant correlation  
313 with the Mental Rotation Test ( $r = .25$ ,  $P = .013$ ), as well as its subscales<sup>78</sup>. Autistic  
314 individuals, on average, score higher on the SQ-R in multiple different studies<sup>10,51,79</sup>. Further,  
315 the SQ-R also predicts autistic traits, with a combination of the SQ-R and the Empathy  
316 Quotient predicting as much as 75% of the variance on the Autism Spectrum Quotient, a  
317 measure of autistic traits<sup>10</sup>. The SQ-R has been validated using a short form in a very large  
318 population of 600,000 controls and 36,000 autistic individuals (Greenberg et al, 2018).

319 In addition, we used the following secondary phenotypes: SCDC in ALSPAC,  
320 ADOS-G social and communication scores and the RBS-R in the other cohorts. We also used  
321 a single question which is a measure of ‘insistence on sameness’ in the NBS cohort.

322 The SCDC is a questionnaire that measures difficulties in verbal and nonverbal  
323 communication, and social interaction including reciprocal social interaction<sup>61</sup>. The  
324 questionnaire consists of 12 questions, with scores ranging from 0 – 24, with higher scores  
325 reflecting difficulties in social interaction and communication. The SCDC has good internal  
326 consistency (0.93) and good test-retest reliability (0.81)<sup>61</sup>. The SCDC has reasonable  
327 specificity and sensitivity in distinguishing clinically diagnosed autism from control  
328 individuals<sup>80</sup>. Previous research has demonstrated that the SCDC is genetically correlated  
329 with autism<sup>44,45,57</sup>. We conducted a GWAS of SCDC to investigate if it is genetically  
330 correlated with SQ-R in this study. We used mother-reported SCDC scores on children aged  
331 8. While SCDC has been measured at different ages in the ALSPAC cohort, we chose SCDC  
332 scores at age 8 as these had the largest sample size and have high  $h^2_{\text{SNP}}$ <sup>19</sup> ( $h^2 = 0.24 \pm 0.07$ ).

333 We chose two measures of social and non-social traits. For the social trait, we used  
334 the social and communication domain scores from the ADOS-G, a widely used instrument for  
335 diagnosing and assessing autism in four cohorts (SSC, AGRE, EU-AIMS LEAP and Paris).  
336 Participants completed one of the following ADOS-G modules<sup>81</sup>: 1 (used for children with  
337 little or no phrase speech), 2 (for children with non-fluent speech), 3 (verbally fluent  
338 children), and 4 (verbally fluent adolescents and adults). For this study, we used the raw  
339 totals of the scores from the social domain and the communication domain, combined. Scores  
340 for all 4 modules range from 0 – 24. The ADOS-G has high overall internal consistency, and  
341 high test-retest reliability for the social and communication subscales<sup>81</sup>. The choice for  
342 combining the social and communication domain scores were informed by factor analysis  
343 which suggested that the two domains contribute to one underlying factor<sup>82</sup>.

344 In contrast to the Social and Communication domain, the restricted and repetitive  
345 behaviour domain of the ADOS-G has poor test retest reliability ( $r < 0.6$ ) and a smaller range  
346 of scores (0 – 8) as it captures fewer repetitive and restrictive behaviour<sup>81</sup>. Hence, for this  
347 study, we used scores on the RBS-R<sup>83</sup>. The RBS-R is a measure developed to specifically  
348 measure restricted and repetitive behaviours in autistic individuals and captures stereotyped,  
349 self-injurious, sameness, compulsive, ritualistic, and restricted behaviour<sup>84</sup>, and has high

350 inter-rater reliability and internal consistency<sup>84</sup>. The RBS-R comprises 43 questions with  
351 scores ranging from 0 – 3 for each item based on a Likert scale.

352 ‘Insistence on sameness’ in the NBS cohort was measured using a single item: “It  
353 upsets me if my daily routine is disturbed”. This is related to a non-social domain of autism,  
354 and is again similar to an item in the Autism Spectrum Quotient. Participants were asked to  
355 indicate on a 4-point Likert scale “definitely agree”, “slightly agree”, “slightly disagree”,  
356 “definitely disagree”.

357 *Genotyping, imputation, and quality control and genetic association in the 23andMe*  
358 *cohort*: Details of genotyping, imputation and quality control in the 23andMe cohort are  
359 provided elsewhere<sup>47</sup>. Briefly, unrelated participants were included if they had a call rate of  
360 greater than 98.5%, and were of primarily European ancestry (97% European ancestry). A  
361 total of 1,030,430 SNPs (including InDels) were genotyped. SNPs were excluded if: they  
362 failed the Hardy-Weinberg Equilibrium Test at  $P < 10^{-20}$ ; had a genotype rate of less than  
363 90%; they failed the parent-offspring transmission test using trio data in the larger 23andMe  
364 research participant database; or if allele frequencies were significantly different from the  
365 European 1000 Genomes reference data (chi-square test,  $P < 10^{-20}$ ). Phasing was conducted  
366 using Beagle (version 3.3.1)<sup>85</sup> in batches of 8000-9000 individuals. This was followed by  
367 imputation against all-ethnicity 1000 Genomes haplotypes (excluding monomorphic and  
368 singleton sites) using Minimac2<sup>86</sup>. Genetic association analyses were restricted to SNPs with  
369 a minor allele frequency  $> 1\%$ . After quality control, 9,955,952 SNPs (imputed and  
370 genotyped) were included in the GWAS.

371 Our primary analysis was an additive model of genetic effects and was conducted  
372 using a linear regression with age, sex, and the first five ancestry principal components  
373 included as covariates. In addition, given the modest sex difference, we also conducted sex-  
374 stratified analyses. SNPs were considered significant at a genome-wide threshold of  $P$   
375  $< 5 \times 10^{-8}$ . Leading SNPs were identified after LD-pruning using Plink ( $r^2 > 0.8$ ). Winner’s  
376 curse correction was conducted using an FDR based shrinking<sup>87</sup>.

377 We calculate variance explained by first standardizing the regression estimates and  
378 then squaring the estimates. This is equivalent to:

$$R^2 = \hat{B}_j^2 \frac{2(MAF_j)(1 - MAF_j)}{\sigma_y^2}$$

379 Where  $R^2$  is the proportion of variance explained for SNP  $j$ .  $\hat{B}_j^2$  is the non-  
380 standardized regression coefficient, MAF is the minor allele frequency for SNP  $j$ , and  $\sigma_y^2$  is  
381 the variance of SQ. Further details of this formula are provided in the **Supplementary Note**.

382 *Genotyping, imputation, and quality control and genetic association in the ALSPAC:*  
383 The SCDC<sup>61</sup> scores were calculated from children of the 90s (ALSPAC cohort)<sup>71</sup>, in children  
384 aged 8. In total, SCDC scores were available on  $N = 7,825$  children. From this, we removed  
385 individuals for whom complete SCDC scores were not available. After excluding related  
386 individuals and individuals with no genetic data, data was available on a total of  $N = 5,421$   
387 unrelated individuals.

388 Participants were genotyped using the Illumina® HumanHap550 quad chip by  
389 Sample Logistics and Genotyping Facilities at the Wellcome Sanger Institute and LabCorp  
390 (Laboratory Corporation of America) using support from 23andMe. Individuals were  
391 excluded based on gender mismatches, high missingness ( $> 3\%$ ), and disproportionate  
392 heterozygosity. We restricted subsequent analyses to individuals of European descent (CEU),  
393 which were identified by multidimensional scaling analysis and compared with Hapmap II  
394 (release 22). Individuals were also removed if cryptic relatedness, assessed using identity by  
395 descent, was greater than 0.1. Genotyped SNPs were filtered out if they had more than 5%  
396 missingness, violated Hardy-Weinberg equilibrium ( $P < 1 \times 10^{-6}$ ), and had a minor-allele  
397 frequency less than 1%, resulting in a total of 526,688 genotyped SNPs. Haplotypes were  
398 estimated using data from mothers and children using ShapeIT (v2.r644)<sup>88</sup>. Imputation was  
399 performed using Impute2 V2.2.2<sup>89</sup> against the 1000 genomes reference panel (Phase 1,  
400 Version 3). Imputed SNPs were excluded from all further analyses if they had a minor allele  
401 frequency  $< 1\%$  and info  $< 0.8$ . After quality control, there were 8,282,911 genotyped and  
402 imputed SNPs that were included in subsequent analyses.

403 Dosage data from BGEN files were converted using hard-calls, with calls with  
404 uncertainty  $> 0.1$  treated as missing data. Post-imputation, we excluded SNPs that deviated  
405 from Hardy-Weinberg Equilibrium ( $P < 1 \times 10^{-6}$ ), with minor allele frequency  $< 0.01$  and  
406 missing call rates  $> 2\%$ . We further excluded individuals with genotype missing rates  $> 5\%$ .  
407 The SCDC score was not normally distributed so we log-transformed the scores and ran  
408 regression analyses using the first two ancestry principal components and sex as the  
409 covariates using Plink 2.0<sup>90</sup>.



410 The log-transformed SCDC scores (henceforth, SCDC scores) had a modest but  
411 significant  $h^2_{\text{SNP}}$  as quantified using LDSR ( $h^2_{\text{SNP}} = 0.12 \pm 0.05$ ). LDSR intercept (0.99)  
412 suggested that there was no inflation in GWAS estimates due to population stratification. The  
413  $\lambda_{\text{GC}}$  was 1.013. We replicated the previously identified genetic correlation with autism<sup>57</sup>  
414 (constrained intercept) using our SCDC GWAS ( $r_g = 0.45 \pm 0.18$ ,  $P = 0.01$ ). In addition, we  
415 also identified a negative genetic correlation between educational attainment<sup>58</sup> and SCDC ( $r_g$   
416  $= -0.30 \pm 0.11$ ,  $P = 0.007$ ).

417 *Genomic inflation factor, heritability, and functional enrichment for the SQ-R GWAS:*  
418 LDSR<sup>91,92</sup> was used to calculate for inflation in test statistics due to unaccounted population  
419 stratification. Heritability was calculated using LDSR using the north-west European LD  
420 scores. Difference in heritability between males and females was quantified using:

$$Z = \frac{h^2_{\text{males}} - h^2_{\text{females}}}{\sqrt{SE^2_{\text{males}} + SE^2_{\text{females}}}}$$

421 where Z is the Z score for the difference in heritability for a trait, ( $h^2_{\text{males}} - h^2_{\text{females}}$ ) is the  
422 difference  $h^2_{\text{SNP}}$  estimate in males and females, and SE is the standard errors for heritability.  
423 Two-tailed P-values were calculated and reported as significant if  $P < 0.05$ .

424 For the primary GWAS (non-stratified analyses), we conducted functional annotation  
425 using FUMA<sup>93</sup>. We restricted our analyses to the non-stratified analyses due to the high  
426 genetic correlation between the sexes and the low statistical power of the sex-stratified  
427 GWAS. We conducted gene-based association analyses using MAGMA<sup>94</sup> within FUMA and  
428 report significant genes after using a stringent Bonferroni corrected  $P < 0.05$ . In addition, we  
429 conducted enrichment for tissue specific expression and pathway analyses within FUMA. For  
430 the significant SNPs, we investigated enrichment for eQTLs using brain tissues in the  
431 BRAINEAC and GTEx<sup>95</sup> database within FUMA. We further conducted partitioned  
432 heritability for tissue specific active chromatin marks and baseline functional categories using  
433 extended methods in LDSR<sup>96</sup>.

434 *Hi-C based annotations of fine mapped loci:* We fine mapped three genome-wide  
435 significant loci (index SNPs: rs4146336 and rs1559586 or SQ; rs8005092 for SQ-R males) to  
436 obtain credible SNPs. First, we selected SNPs with  $P < 0.01$  that are located in the linkage  
437 disequilibrium (LD) region ( $r^2 > 0.6$ ) with an index SNP. LD structure within a locus was  
438 constructed by calculating correlations between SNPs within a locus (1KG v20130502).

439 CAVIAR<sup>97</sup> was then applied to the summary association statistics and LD structure for each  
440 index SNP to generate potentially causal (credible) SNPs with a posterior probability of 0.95.  
441 In total, we identified 14 credible SNPs from the three GWS loci.

442 For each locus, candidate genes were identified by mapping credible SNPs based on  
443 physical interactions in foetal brain as previously described<sup>98</sup>. One locus (index SNP  
444 rs4146336) was mapped to two genes, *LSAMP* and *PTMAP8*, indicating that two credible  
445 SNPs (rs13066948 and rs11713893) located in this locus physically interact with these genes.

446 *Genetic correlation:* For all phenotypes we performed genetic correlation without  
447 constraining the intercept using LDSR. We identified significant genetic correlations using a  
448 Bonferroni adjusted P-value < 0.05. For the primary genetic correlation analysis with SQ-R,  
449 we included psychiatric conditions<sup>57,63,99–102</sup>, personality traits<sup>103–105</sup>, measures of  
450 intelligence<sup>58,59,106,107</sup>, and social traits related to autism<sup>46,55</sup> including scores on the SCDC, as  
451 previous research has investigated the phenotypic correlation between these domains and  
452 systemizing<sup>10,78,108–112</sup>.

453 To understand the correlation between systemizing and various phenotypes that have  
454 been genetically correlated with autism, we used GWAS data from 15 phenotypes including  
455 autism. 10 of these phenotypes (cognitive aptitude<sup>59</sup>, educational attainment<sup>58</sup>, tiredness<sup>113</sup>,  
456 neuroticism<sup>103</sup>, subjective wellbeing<sup>103</sup>, schizophrenia<sup>114</sup>, major depression<sup>102</sup>, depressive  
457 symptoms<sup>103</sup>, ADHD<sup>63</sup> and chronotype<sup>115</sup>), have been previously reported to be significantly  
458 genetically correlated with autism out of 234 phenotypes tested using LDHub<sup>62</sup> ( $P < 2.1 \times 10^{-4}$ ).  
459 We excluded college degree from this list, as previous work has identified near perfect  
460 genetic correlation between educational attainment and college degree<sup>58</sup>. In addition, we  
461 included data from friendship satisfaction<sup>55</sup>, family satisfaction<sup>55</sup>, systemizing, and self-  
462 reported empathy<sup>46</sup>, all of which are also significantly genetically correlated with autism with  
463  $P < 2.1 \times 10^{-4}$ . These four additional phenotypes were not included in the previous paper which  
464 investigated genetic correlations with autism. Details of sample sizes with PMIDs/DOIs are  
465 provided in **Supplementary Table 12**. Cross trait genetic correlations were computed for all  
466 15 phenotypes, and results were corrected for multiple testing using Bonferroni correction. A  
467 correlogram was created after using hierarchical clustering to cluster the phenotypes.

468 To investigate if the combination of negative genetic correlation social traits and  
469 positive genetic correlation for non-social traits is specific to autism, we conducted a genetic  
470 correlation between all psychiatric conditions for which we had access to summary GWAS

471 statistics (ADHD<sup>63</sup>, Anxiety<sup>116</sup>, Autism<sup>57</sup>, Anorexia<sup>101</sup>, Bipolar Disorder<sup>99</sup>, Major Depressive  
472 Disorder<sup>102</sup>, OCD<sup>117,118</sup>, PTSD<sup>119</sup>, and Schizophrenia<sup>114</sup>) and SQ-R, self-reported empathy  
473 measured using the EQ<sup>46</sup> and friendship satisfaction<sup>55</sup>. We chose friendship satisfaction and  
474 self-reported empathy as representative of social traits as these are the most relevant to the  
475 social domain of autism that we had access to GWAS summary statistics. The EQ is a short,  
476 40-item self-report measure of empathy, which has been widely used and has good  
477 psychometric properties<sup>60,120</sup>. For instance, in the DSM-5, one of the criteria for autism is  
478 difficulties in making friends<sup>1</sup>. Additionally, differences in aspects of empathy compared to  
479 the neurotypical population have been widely reported in autism<sup>50,51,121</sup>, and is one of the  
480 items in measures such as ADOS-G.

481 *GWIS and GSEM*: To investigate if the SQ-R is genetically correlated with autism  
482 independent of the genetic effects of educational attainment, we constructed a unique SQ-R  
483 phenotype after conditioning on the genetic effects of educational attainment using GWIS<sup>122</sup>.  
484 GWIS takes into account the genetic covariance between the two phenotypes to calculate the  
485 unique component of the phenotypes as a function of the genetic covariance and the  $h^2_{\text{SNP}}$ .  
486 Prior to performing GWIS, we standardized the beta coefficients for the SQ-R GWAS by  
487 using the following formula:

$$\widehat{B}_{std} = \widehat{B} \sqrt{\frac{2(MAF)(1 - MAF)}{\sigma^2_y}}$$

488 Where  $\widehat{B}_{std}$  is the standardized regression coefficients,  $\widehat{B}$  is the regression coefficient  
489 obtained from the non-standardized GWAS, MAF is the minor allele frequency,  $\sigma^2_y$  is the  
490 variance of the SQ-R. This equation is explained in detail in the **Supplementary Note**. We  
491 conducted GWIS using only educational attainment as we were unclear if the GWAS of  
492 cognitive aptitude<sup>59</sup> was conducted on a standardized phenotype. Further, there is a high  
493 genetic correlation between cognitive aptitude and educational attainment. In addition to  
494 GWIS, to validate the findings, we conducted GSEM<sup>123</sup>, a complementary but independent  
495 method. GSEM uses the correlations and covariances calculated using LDSR after accounting  
496 for sample overlap.

497 *Polygenic scores in the SSC, AGRE, EU-AIMS LEAP and Paris cohorts*: We  
498 generated polygenic scores for SQ-R (mean weighted score of all the alleles that contribute to  
499 higher systemizing) in 2,221 probands from the Simons Simplex Collection (Discovery

500 dataset). We downloaded genotype data from the SSC from SFARI base  
501 (<https://www.sfari.org/resource/sfari-base/>). Individuals were genotyped on three different  
502 platforms: Illumina Omni2.5, Illumina 1Mv3, or Illumina 1Mv1. Informed consent or assent  
503 was obtained from all participants. In addition, the research team obtained ethical approval  
504 from the Cambridge Human Biology Research Ethics Committee to access and analyse the  
505 de-identified data from the Simons Simplex collection. We conducted a stringent quality  
506 control and imputation to generate genotypes used in this analysis for each of the platforms  
507 separately. The full pipeline is available here: [https://github.com/autism-research-](https://github.com/autism-research-centre/SSC_liftover_imputation)  
508 [centre/SSC\\_liftover\\_imputation](https://github.com/autism-research-centre/SSC_liftover_imputation). Briefly, individuals were excluded if they had: a genotyping  
509 rate < 95%, excessive or low heterozygosity (less or more than 3 SD from the mean),  
510 mismatched reported and genetic sex, and families with mendelian errors > 5%. We further  
511 removed SNPs that significantly deviated from Hardy-Weinberg Equilibrium ( $P < 1 \times 10^{-6}$ ),  
512 had mendelian errors in more than 10% of the families, and SNPs that were not genotyped in  
513 more than 10% of the families. We then conducted multidimensional scaling using the  
514 HapMap3 phase 3 population using the unrelated individuals CEU and TSI populations as  
515 representatives of the European population. This was conducted only in the parents to retain  
516 unrelated individuals for multidimensional scaling. Genetic principal components were  
517 calculated using only SNPs with minor allele frequency > 5%, and pruning the SNPs in Plink  
518 using an  $r^2$  of 0.2. We excluded families from further downstream analyses if either one the  
519 parents were greater or less than 5 standard deviations from the means of the first two genetic  
520 principal components calculated using only the unrelated individuals in HapMap3 CEU and  
521 TSI populations. Quality control was done using Plink v 1.9 and R. Phasing and imputation  
522 was conducted using the Michigan Imputation Server  
523 (<https://imputationserver.sph.umich.edu/start.html>) using the 1000 genomes Phase 3 v5 as the  
524 reference panel.

525 Polygenic scores were generated using PRSice2  
526 (<https://choishingwan.github.io/PRSice/>) for the SQ-R using the non-stratified GWAS data.  
527 We calculated the mean polygenic score for each of the 2,221 probands in the SSC, after  
528 clumping SNPs using an  $R^2$  threshold of 0.1. Prior to generating polygenic scores, we  
529 confirmed that the probands were not related to each other using identity by descent PI-HAT  
530 > 0.15 as a relatedness cut-off. We used a P-value threshold of 1 as previous research on  
531 educational attainment, subjective wellbeing and social relationship satisfaction, all suggest  
532 that the maximum variance explained is at a threshold of 1<sup>58,103</sup>. This is expected for highly

533 polygenic traits where many SNPs incrementally contribute to the variance explained<sup>124</sup>.  
534 Polygenic scoring was done using standardized scores on two different phenotypes as the  
535 dependent variable (RBS-R and the social and communication domain of the ADOS-G). We  
536 included sex, platform, the first 15 genetic principal components and standardized full-scale  
537 IQ as covariates. In addition, for the analysis of ADOS-G, we included the ADOS-G module  
538 as a covariate. Linear regression was conducted in R. A total of 135,233 SNPs were included  
539 in the polygenic score analyses after clumping and thresholding.

540 To validate the polygenic scores, we conducted additional polygenic score analysis  
541 using data combined from the AGRE, EU-AIMS LEAP and Paris cohorts. We followed  
542 similar quality control and imputation procedures to the SSC cohort. Given that this dataset  
543 was a mix of related and unrelated individuals, we chose unrelated individuals using a  
544 genomic relationship matrix (GRM) as provided in GCTA (--grm-cutoff 0.05)<sup>125</sup>. To  
545 calculate GRMs, we included only SNPs with minor allele frequency > 1%. Scripts are  
546 provided here: [https://github.com/vwarrier/PARIS\\_LEAP\\_analysis](https://github.com/vwarrier/PARIS_LEAP_analysis). Polygenic scores were  
547 calculated using PRSice2 as described for the SSC data. Given the differences in dataset,  
548 polygenic scores were calculated separately for the AGRE dataset, and the EU-AIMS LEAP  
549 and Paris datasets combined. For each regression, we included sex and the first 10 genetic  
550 principal components (standardized). The dependent variables were standardized scores on  
551 the RBS-R (N = 426) and the ADOS-G social and communication subscale (N = 475). IQ  
552 information was unavailable for most individuals, and hence we did not include IQ as a  
553 covariate. We combined the results of the EU-AIMS LEAP and Paris cohorts, and the AGRE  
554 dataset using inverse variance weighted fixed-effect meta-analysis using the formula below:

$$w_i = 1/SE_i^2$$

$$SE_{meta} = \sqrt{1/\sum_i w_i}$$

$$Beta_{meta} = \sum_i \beta_i w_i / \sum_i w_i$$

555

556 Where  $\beta_i$  is the standardized regression coefficient of the polygenic scores,  $SE_i$  is the  
557 associated standard error, and  $w_i$  is the weight.

558 *Bivariate GREML:* We conducted bivariate genetic correlation using GCTA GREML  
559 to test the genetic correlation between the ADOS social and communication domains and the  
560 RBS-R scores. We created a GRM after including autistic individuals from the SSC, AGRE,

561 EU-AIMS LEAP and Paris cohorts. We excluded SNPs and individuals using the same  
562 quality control pipeline as applied to the SSC dataset outlined in the section above. We  
563 further restricted our analysis only to SNPs with a minor allele frequency > 1%. We excluded  
564 related individuals (--grm-cutoff 0.05) resulting in a total of 2,989 individuals. Of this, 2,652  
565 individuals had scores for the ADOS social and communication domain and 2,550  
566 individuals had scores on the RBS-R. We included sex and the first 10 genetic principal  
567 components as covariates.

568

### 569 **Data availability**

570 The SQ-R GWAS results are available from 23andMe. The full set of summary statistics can  
571 be made available to qualified investigators who enter into an agreement with 23andMe that  
572 protects participant confidentiality. Interested investigators should email dataset-  
573 request@23andme.com for more information. Top SNPs (n = 10,000) can be visualized here:  
574 <https://ghfc.pasteur.fr>. Data for ALSPAC can be requested here:  
575 <http://www.bristol.ac.uk/alspac/researchers/access/>. Data from the Simons Simplex  
576 Collection can be requested here: <https://www.sfari.org/resource/sfari-base/>. Summary  
577 GWAS statistics were downloaded from the PGC consortium:  
578 <http://www.med.unc.edu/pgc/results-and-downloads>. Data for chronotype was downloaded  
579 from <http://www.t2diabetesgenes.org/data/>. Data for self-reported tiredness was downloaded  
580 from <http://www.ccace.ed.ac.uk/node/335>.

581

### 582 **Software and code availability**

583 Genomic-SEM: <https://github.com/MichelNivard/GenomicSEM>  
584 GWIS: <https://sites.google.com/site/mgnivard/gwis>  
585 Plink: <https://www.cog-genomics.org/plink2/>  
586 PRSice2: <https://choishingwan.github.io/PRSice/>  
587 CAVIAR: <http://genetics.cs.ucla.edu/caviar/>  
588 Michigan Imputation Server: <https://imputationserver.sph.umich.edu/index.html>  
589 Custom code for quality control of the SSC and the other cohorts can be downloaded from  
590 [https://github.com/autism-research-centre/SSC\\_liftover\\_imputation](https://github.com/autism-research-centre/SSC_liftover_imputation)  
591 (DOI: 10.5281/zenodo.3342561) and from

592 [https://github.com/vwarrier/PARIS\\_LEAP\\_analysis](https://github.com/vwarrier/PARIS_LEAP_analysis)

593 (DOI: 10.5281/zenodo.3342569)

594

595

596

597

## 598 **References**

- 599 1. American Psychiatric Association. *Diagnostic and statistical manual of mental*  
600 *disorders (5th ed.)*. (2013).
- 601 2. Happé, F. & Ronald, A. The ‘Fractionable Autism Triad’: A Review of Evidence from  
602 Behavioural, Genetic, Cognitive and Neural Research. *Neuropsychol. Rev.* **18**, 287–  
603 304 (2008).
- 604 3. Happé, F., Ronald, A. & Plomin, R. Time to give up on a single explanation for  
605 autism. *Nat. Neurosci.* **9**, 1218–1220 (2006).
- 606 4. Shuster, J., Perry, A., Bebko, J. & Toplak, M. E. Review of Factor Analytic Studies  
607 Examining Symptoms of Autism Spectrum Disorders. *J. Autism Dev. Disord.* **44**, 90–  
608 110 (2014).
- 609 5. Mandy, W. P. L. & Skuse, D. H. Research Review: What is the association between  
610 the social-communication element of autism and repetitive interests, behaviours and  
611 activities? *J. Child Psychol. Psychiatry* **49**, 795–808 (2008).
- 612 6. Palmer, C. J., Paton, B., Enticott, P. G. & Hohwy, J. ‘Subtypes’ in the Presentation of  
613 Autistic Traits in the General Adult Population. *J. Autism Dev. Disord.* **45**, 1291–1301  
614 (2015).
- 615 7. Guthrie, W., Swineford, L. B., Wetherby, A. M. & Lord, C. Comparison of DSM-IV  
616 and DSM-5 Factor Structure Models for Toddlers With Autism Spectrum Disorder. *J.*  
617 *Am. Acad. Child Adolesc. Psychiatry* **52**, 797–805.e2 (2013).
- 618 8. Frazier, T. W., Youngstrom, E. A., Kubu, C. S., Sinclair, L. & Rezai, A. Exploratory  
619 and Confirmatory Factor Analysis of the Autism Diagnostic Interview-Revised. *J.*  
620 *Autism Dev. Disord.* **38**, 474–480 (2008).
- 621 9. Grove, R., Baillie, A., Allison, C., Baron-Cohen, S. & Hoekstra, R. A. Empathizing,  
622 systemizing, and autistic traits: Latent structure in individuals with autism, their  
623 parents, and general population controls. *J. Abnorm. Psychol.* **122**, 600–609 (2013).
- 624 10. Wheelwright, S. J. *et al.* Predicting Autism Spectrum Quotient (AQ) from the  
625 Systemizing Quotient-Revised (SQ-R) and Empathy Quotient (EQ). *Brain Res.* **1079**,  
626 47–56 (2006).
- 627 11. Svedholm-Häkkinen, A. M., Halme, S. & Lindeman, M. Empathizing and systemizing  
628 are differentially related to dimensions of autistic traits in the general population. *Int.*



- 629 *J. Clin. Heal. Psychol.* **18**, 35–42 (2018).
- 630 12. Greenberg, D. M., Warrier, V., Allison, C. & Baron-Cohen, S. Testing the  
631 Empathizing-Systemizing theory of sex differences and the Extreme Male Brain theory  
632 of autism in half a million people. *Proc. Natl. Acad. Sci. U. S. A.* 201811032 (2018).  
633 doi:10.1073/pnas.1811032115
- 634 13. Ronald, A., Happe, F. & Plomin, R. The genetic relationship between individual  
635 differences in social and nonsocial behaviours characteristic of autism. *Dev. Sci.* **8**,  
636 444–458 (2005).
- 637 14. Ronald, A. *et al.* Genetic Heterogeneity Between the Three Components of the Autism  
638 Spectrum: A Twin Study. *J. Am. Acad. Child Adolesc. Psychiatry* **45**, 691–699 (2006).
- 639 15. Dworzynski, K., Happé, F., Bolton, P. & Ronald, A. Relationship Between Symptom  
640 Domains in Autism Spectrum Disorders: A Population Based Twin Study. *J. Autism*  
641 *Dev. Disord.* **39**, 1197–1210 (2009).
- 642 16. Norbury, C. F. Practitioner Review: Social (pragmatic) communication disorder  
643 conceptualization, evidence and clinical implications. *J. Child Psychol. Psychiatry* **55**,  
644 204–216 (2014).
- 645 17. Uljarević, M., Evans, D. W., Alvares, G. A. & Whitehouse, A. J. O. Short report:  
646 relationship between restricted and repetitive behaviours in children with autism  
647 spectrum disorder and their parents. *Mol. Autism* **7**, 29 (2016).
- 648 18. Georgiades, S. *et al.* Investigating phenotypic heterogeneity in children with autism  
649 spectrum disorder: a factor mixture modeling approach. *J. Child Psychol. Psychiatry*  
650 **54**, 206–215 (2013).
- 651 19. St Pourcain, B. *et al.* Variability in the common genetic architecture of social-  
652 communication spectrum phenotypes during childhood and adolescence. *Mol. Autism*  
653 **5**, 18 (2014).
- 654 20. Cantor, R. M. *et al.* ASD restricted and repetitive behaviors associated at 17q21.33:  
655 genes prioritized by expression in fetal brains. *Mol. Psychiatry* (2017).  
656 doi:10.1038/mp.2017.114
- 657 21. Alarcón, M., Cantor, R. M., Liu, J., Gilliam, T. C. & Geschwind, D. H. Evidence for a  
658 language quantitative trait locus on chromosome 7q in multiplex autism families. *Am.*  
659 *J. Hum. Genet.* **70**, 60–71 (2002).
- 660 22. Lowe, J. K., Werling, D. M., Constantino, J. N., Cantor, R. M. & Geschwind, D. H.  
661 Social responsiveness, an autism endophenotype: genomewide significant linkage to  
662 two regions on chromosome 8. *Am. J. Psychiatry* **172**, 266–75 (2015).
- 663 23. Shao, Y. *et al.* Fine mapping of autistic disorder to chromosome 15q11-q13 by use of  
664 phenotypic subtypes. *Am. J. Hum. Genet.* **72**, 539–48 (2003).
- 665 24. Cannon, D. S. *et al.* Genome-wide linkage analyses of two repetitive behavior  
666 phenotypes in Utah pedigrees with autism spectrum disorders. *Mol. Autism* **1**, 3 (2010).
- 667 25. Tao, Y. *et al.* Evidence for contribution of common genetic variants within  
668 chromosome 8p21.2-8p21.1 to restricted and repetitive behaviors in autism spectrum  
669 disorders. *BMC Genomics* **17**, 163 (2016).
- 670 26. Ruzich, E. *et al.* Measuring autistic traits in the general population: a systematic

- 671 review of the Autism-Spectrum Quotient (AQ) in a nonclinical population sample of  
672 6,900 typical adult males and females. *Mol. Autism* **6**, 2 (2015).
- 673 27. Baron-Cohen, S., Wheelwright, S. J., Skinner, R., Martin, J. & Clubley, E. The autism-  
674 spectrum quotient (AQ): evidence from Asperger syndrome/high-functioning autism,  
675 males and females, scientists and mathematicians. *J. Autism Dev. Disord.* **31**, 5–17  
676 (2001).
- 677 28. Posserud, M.-B., Lundervold, A. J. & Gillberg, C. Autistic features in a total  
678 population of 7-9-year-old children assessed by the ASSQ (Autism Spectrum  
679 Screening Questionnaire). *J. Child Psychol. Psychiatry* **47**, 167–175 (2006).
- 680 29. Constantino, J. N. & Todd, R. D. Autistic Traits in the General Population. *Arch. Gen.*  
681 *Psychiatry* **60**, 524 (2003).
- 682 30. Constantino, J. N. *et al.* The factor structure of autistic traits. *J. Child Psychol.*  
683 *Psychiatry* **45**, 719–726 (2004).
- 684 31. Hoekstra, R. A. *et al.* Heritability of autistic traits in the general population. *Arch.*  
685 *Pediatr. Adolesc. Med.* **161**, 372–7 (2007).
- 686 32. Ronald, A. & Hoekstra, R. A. Autism spectrum disorders and autistic traits: A decade  
687 of new twin studies. *Am. J. Med. Genet. Part B Neuropsychiatr. Genet.* **156**, 255–274  
688 (2011).
- 689 33. de Zeeuw, E. L., van Beijsterveldt, C. E. M., Hoekstra, R. A., Bartels, M. & Boomsma,  
690 D. I. The etiology of autistic traits in preschoolers: a population-based twin study. *J.*  
691 *Child Psychol. Psychiatry* **58**, 893–901 (2017).
- 692 34. Wheelwright, S. J., Auyeung, B., Allison, C. & Baron-Cohen, S. Defining the broader,  
693 medium and narrow autism phenotype among parents using the Autism Spectrum  
694 Quotient (AQ). *Mol. Autism* **1**, 10 (2010).
- 695 35. Sucksmith, E., Roth, I. & Hoekstra, R. A. Autistic Traits Below the Clinical  
696 Threshold: Re-examining the Broader Autism Phenotype in the 21st Century.  
697 *Neuropsychol. Rev.* **21**, 360–389 (2011).
- 698 36. Sasson, N. J., Lam, K. S., Parlier, M., Daniels, J. L. & Piven, J. Autism and the broad  
699 autism phenotype: familial patterns and intergenerational transmission. *J. Neurodev.*  
700 *Disord.* **5**, 11 (2013).
- 701 37. Constantino, J. N. & Todd, R. D. Intergenerational transmission of subthreshold  
702 autistic traits in the general population. *Biol. Psychiatry* **57**, 655–660 (2005).
- 703 38. Murray, A. L., McKenzie, K., Kuenssberg, R. & Booth, T. Do the Autism Spectrum  
704 Quotient (AQ) and Autism Spectrum Quotient Short Form (AQ-S) Primarily Reflect  
705 General ASD Traits or Specific ASD Traits? A Bi-Factor Analysis. *Assessment* **24**,  
706 444–457 (2017).
- 707 39. Lundström, S. *et al.* Autism Spectrum Disorders and Autisticlike Traits. *Arch. Gen.*  
708 *Psychiatry* **69**, 46 (2012).
- 709 40. Robinson, E. B. *et al.* Evidence that autistic traits show the same etiology in the  
710 general population and at the quantitative extremes (5%, 2.5%, and 1%). *Arch. Gen.*  
711 *Psychiatry* **68**, 1113–21 (2011).
- 712 41. Ronald, A., Happé, F., Price, T. S., Baron-Cohen, S. & Plomin, R. Phenotypic and

- 713 genetic overlap between autistic traits at the extremes of the general population. *J. Am.*  
714 *Acad. Child Adolesc. Psychiatry* **45**, 1206–14 (2006).
- 715 42. Colvert, E. *et al.* Heritability of autism spectrum disorder in a UK population-based  
716 twin sample. *JAMA Psychiatry* **72**, 415–23 (2015).
- 717 43. Bralten, J. *et al.* Autism spectrum disorders and autistic traits share genetics and  
718 biology. *Mol. Psychiatry* (2017). doi:10.1038/mp.2017.98
- 719 44. St Pourcain, B. *et al.* ASD and schizophrenia show distinct developmental profiles in  
720 common genetic overlap with population-based social communication difficulties.  
721 *Mol. Psychiatry* (2017). doi:10.1038/mp.2016.198
- 722 45. Robinson, E. B. *et al.* Genetic risk for autism spectrum disorders and neuropsychiatric  
723 variation in the general population. *Nat. Genet.* **48**, 552–5 (2016).
- 724 46. Warrier, V. *et al.* Genome-wide analyses of self-reported empathy: Correlations with  
725 autism, schizophrenia, and anorexia nervosa. *Transl. Psychiatry* **8**, (2018).
- 726 47. Warrier, V. *et al.* Genome-wide meta-analysis of cognitive empathy: heritability, and  
727 correlates with sex, neuropsychiatric conditions and cognition. *Mol. Psychiatry* (2017).
- 728 48. Cantor, R. M. *et al.* ASD restricted and repetitive behaviors associated at 17q21.33:  
729 genes prioritized by expression in fetal brains. *Mol. Psychiatry* **23**, 993–1000 (2018).
- 730 49. Baron-Cohen, S. The hyper-systemizing, assortative mating theory of autism. *Prog.*  
731 *Neuropsychopharmacol. Biol. Psychiatry* **30**, 865–72 (2006).
- 732 50. Auyeung, B. *et al.* The Children’s Empathy Quotient and Systemizing Quotient: Sex  
733 Differences in Typical Development and in Autism Spectrum Conditions. *J. Autism*  
734 *Dev. Disord.* **39**, 1509–1521 (2009).
- 735 51. Baron-Cohen, S. *et al.* Attenuation of typical sex differences in 800 adults with autism  
736 vs. 3,900 controls. *PLoS One* **9**, e102251 (2014).
- 737 52. Asperger, H. ‘Autistic psychopathy’ in childhood. in *Autism and Asperger syndrome*  
738 (ed. Frith, U.) 37–92 (Cambridge University Press, 1944).  
739 doi:10.1017/CBO9780511526770.002
- 740 53. Kanner, L. Autistic disturbances of affective contact. *Nerv. Child J. Psychopathol.*  
741 *Psychother. Ment. Hyg. Guid. Child* **2** 217–50 (1943).
- 742 54. Auyeung, B. *et al.* Foetal testosterone and the child systemizing quotient. *Eur. J.*  
743 *Endocrinol.* **155**, S123–S130 (2006).
- 744 55. Warrier, V., the 23andMe Research team, Bourgeron, T. & Baron-Cohen, S. Genome-  
745 wide association study of social relationship satisfaction: significant loci and  
746 correlations with psychiatric conditions. *bioRxiv* 196071 (2017). doi:10.1101/196071
- 747 56. Palmer, E. E. *et al.* A Recurrent De Novo Nonsense Variant in ZSWIM6 Results in  
748 Severe Intellectual Disability without Frontonasal or Limb Malformations. *Am. J.*  
749 *Hum. Genet.* **101**, 995–1005 (2017).
- 750 57. Grove, J. *et al.* Identification of common genetic risk variants for autism spectrum  
751 disorder. *Nat. Genet.* **51**, 431–444 (2019).
- 752 58. Okbay, A. *et al.* Genome-wide association study identifies 74 loci associated with  
753 educational attainment. *Nature* **533**, 539–542 (2016).

- 754 59. Sniekers, S. *et al.* Genome-wide association meta-analysis of 78,308 individuals  
755 identifies new loci and genes influencing human intelligence. *Nat. Genet.* (2017).  
756 doi:10.1038/ng.3869
- 757 60. Baron-Cohen, S. & Wheelwright, S. J. The Empathy Quotient: an investigation of  
758 adults with Asperger syndrome or high functioning autism, and normal sex  
759 differences. *J. Autism Dev. Disord.* **34**, 163–75 (2004).
- 760 61. Skuse, D. H., Mandy, W. P. L. & Scourfield, J. Measuring autistic traits: heritability,  
761 reliability and validity of the Social and Communication Disorders Checklist. *Br. J.*  
762 *Psychiatry* **187**, 568–572 (2005).
- 763 62. Zheng, J. *et al.* LD Hub: a centralized database and web interface to perform LD score  
764 regression that maximizes the potential of summary level GWAS data for SNP  
765 heritability and genetic correlation analysis. *Bioinformatics* **33**, 272–279 (2016).
- 766 63. Demontis, D. *et al.* Discovery of the first genome-wide significant risk loci for  
767 attention deficit/hyperactivity disorder. *Nat. Genet.* **51**, 63–75 (2019).
- 768 64. Ripke, S. *et al.* Genome-wide association analysis identifies 13 new risk loci for  
769 schizophrenia. *Nat. Genet.* **45**, 1150–1159 (2013).
- 770 65. Stahl, E. *et al.* Genomewide association study identifies 30 loci associated with bipolar  
771 disorder. *bioRxiv* 173062 (2018). doi:10.1101/173062
- 772 66. Baron-Cohen, S. The extreme male brain theory of autism. *Trends Cogn. Sci.* **6**, 248–  
773 254 (2002).
- 774 67. Tung, J. Y. *et al.* Efficient replication of over 180 genetic associations with self-  
775 reported medical data. *PLoS One* **6**, e23473 (2011).
- 776 68. Do, C. B. *et al.* Web-based genome-wide association study identifies two novel loci  
777 and a substantial genetic component for Parkinson’s disease. *PLoS Genet.* **7**, e1002141  
778 (2011).
- 779 69. Eriksson, N. *et al.* Novel associations for hypothyroidism include known autoimmune  
780 risk loci. *PLoS One* **7**, e34442 (2012).
- 781 70. Henn, B. M. *et al.* Cryptic distant relatives are common in both isolated and  
782 cosmopolitan genetic samples. *PLoS One* **7**, e34267 (2012).
- 783 71. Boyd, A. *et al.* Cohort Profile: The ‘Children of the 90s’—the index offspring of the  
784 Avon Longitudinal Study of Parents and Children. *Int. J. Epidemiol.* **42**, 111–127  
785 (2013).
- 786 72. Fischbach, G. D. & Lord, C. The Simons Simplex Collection: A Resource for  
787 Identification of Autism Genetic Risk Factors. *Neuron* **68**, 192–195 (2010).
- 788 73. Geschwind, D. H. *et al.* The autism genetic resource exchange: a resource for the study  
789 of autism and related neuropsychiatric conditions. *Am. J. Hum. Genet.* **69**, 463–6  
790 (2001).
- 791 74. Charman, T. *et al.* The EU-AIMS Longitudinal European Autism Project (LEAP):  
792 clinical characterisation. *Mol. Autism* **8**, 27 (2017).
- 793 75. Durand, C. M. *et al.* Mutations in the gene encoding the synaptic scaffolding protein  
794 SHANK3 are associated with autism spectrum disorders. *Nat. Genet.* **39**, 25–27  
795 (2007).

- 796 76. Groen, Y., Fuermaier, A. B. M., Den Heijer, A. E., Tucha, O. & Althaus, M. The  
797 Empathy and Systemizing Quotient: The psychometric properties of the Dutch version  
798 and a review of the cross-cultural stability. *J. Autism Dev. Disord.* **45**, 2848–64 (2015).
- 799 77. Allison, C., Baron-Cohen, S., Stone, M. H. & Muncer, S. J. Rasch modeling and  
800 confirmatory factor analysis of the systemizing quotient-revised (SQ-R) scale. *Span. J.*  
801 *Psychol.* **18**, E16 (2015).
- 802 78. Ling, J., Burton, T. C., Salt, J. L. & Muncer, S. J. Psychometric analysis of the  
803 systemizing quotient (SQ) scale. *Br. J. Psychol.* **100**, 539–552 (2009).
- 804 79. Wakabayashi, A. *et al.* Empathizing and systemizing in adults with and without autism  
805 spectrum conditions: Cross-cultural stability. *J. Autism Dev. Disord.* **37**, 1823–1832  
806 (2007).
- 807 80. Bölte, S., Westerwald, E., Holtmann, M., Freitag, C. M. & Poustka, F. Autistic traits  
808 and autism spectrum disorders: the clinical validity of two measures presuming a  
809 continuum of social communication skills. *J. Autism Dev. Disord.* **41**, 66–72 (2011).
- 810 81. Lord, C. *et al.* The Autism Diagnostic Observation Schedule—Generic: A Standard  
811 Measure of Social and Communication Deficits Associated with the Spectrum of  
812 Autism. *J. Autism Dev. Disord.* **30**, 205–223 (2000).
- 813 82. Gotham, K., Risi, S., Pickles, A. & Lord, C. The Autism Diagnostic Observation  
814 Schedule: Revised Algorithms for Improved Diagnostic Validity. *J. Autism Dev.*  
815 *Disord.* **37**, 613–627 (2007).
- 816 83. Bodfish, J. W., Symons, F. J., Parker, D. E. & Lewis, M. H. Varieties of Repetitive  
817 Behavior in Autism: Comparisons to Mental Retardation. *J. Autism Dev. Disord.* **30**,  
818 237–243 (2000).
- 819 84. Lam, K. S. L. & Aman, M. G. The Repetitive Behavior Scale-Revised: Independent  
820 Validation in Individuals with Autism Spectrum Disorders. *J. Autism Dev. Disord.* **37**,  
821 855–866 (2007).
- 822 85. Browning, S. R. & Browning, B. L. Rapid and accurate haplotype phasing and  
823 missing-data inference for whole-genome association studies By use of localized  
824 haplotype clustering. *Am. J. Hum. Genet.* **81**, 1084–1097 (2007).
- 825 86. Fuchsberger, C., Abecasis, G. R. & Hinds, D. A. minimac2: faster genotype  
826 imputation. *Bioinformatics* **31**, 782–784 (2015).
- 827 87. Bigdeli, T. B. *et al.* A simple yet accurate correction for winner’s curse can predict  
828 signals discovered in much larger genome scans. *Bioinformatics* **32**, 2598–2603  
829 (2016).
- 830 88. Delaneau, O., Marchini, J. & Zagury, J.-F. A linear complexity phasing method for  
831 thousands of genomes. *Nat. Methods* **9**, 179–181 (2011).
- 832 89. Howie, B. N., Donnelly, P. & Marchini, J. A flexible and accurate genotype  
833 imputation method for the next generation of genome-wide association studies. *PLoS*  
834 *Genet.* **5**, e1000529 (2009).
- 835 90. Purcell, S. *et al.* PLINK: a tool set for whole-genome association and population-based  
836 linkage analyses. *Am. J. Hum. Genet.* **81**, 559–75 (2007).
- 837 91. Bulik-Sullivan, B. K. *et al.* LD Score regression distinguishes confounding from



- 838 polygenicity in genome-wide association studies. *Nat. Genet.* **47**, 291–295 (2015).
- 839 92. Bulik-Sullivan, B. K. *et al.* An atlas of genetic correlations across human diseases and  
840 traits. *Nat. Genet.* **47**, 1236–41 (2015).
- 841 93. Watanabe, K., Taskesen, E., van Bochoven, A. & Posthuma, D. Functional mapping  
842 and annotation of genetic associations with FUMA. *Nat. Commun.* **8**, 1826 (2017).
- 843 94. de Leeuw, C. A., Mooij, J. M., Heskes, T. & Posthuma, D. MAGMA: generalized  
844 gene-set analysis of GWAS data. *PLoS Comput. Biol.* **11**, 1–19 (2015).
- 845 95. Ardlie, K. G. *et al.* The Genotype-Tissue Expression (GTEx) pilot analysis: multitissue  
846 gene regulation in humans. *Science (80-. )*. **348**, 648–60 (2015).
- 847 96. Finucane, H. K. *et al.* Partitioning heritability by functional annotation using genome-  
848 wide association summary statistics. *Nat. Genet.* **47**, 1228–1235 (2015).
- 849 97. Hormozdiari, F., Kostem, E., Kang, E. Y., Pasaniuc, B. & Eskin, E. Identifying Causal  
850 Variants at Loci with Multiple Signals of Association. *Genetics* **198**, 497–508 (2014).
- 851 98. Won, H. *et al.* Chromosome conformation elucidates regulatory relationships in  
852 developing human brain. *Nature* **538**, 523–527 (2016).
- 853 99. Sklar, P. *et al.* Large-scale genome-wide association analysis of bipolar disorder  
854 identifies a new susceptibility locus near ODZ4. *Nat. Genet.* **43**, 977–983 (2011).
- 855 100. Pardiñas, A. F. *et al.* Common schizophrenia alleles are enriched in mutation-  
856 intolerant genes and in regions under strong background selection. *Nat. Genet.* **1**  
857 (2018). doi:10.1038/s41588-018-0059-2
- 858 101. Duncan, L. E. *et al.* Significant locus and metabolic genetic correlations revealed in  
859 genome-wide association study of anorexia nervosa. *Am. J. Psychiatry* appi.ajp.2017.1  
860 (2017). doi:10.1176/appi.ajp.2017.16121402
- 861 102. Wray, N. R. *et al.* Genome-wide association analyses identify 44 risk variants and  
862 refine the genetic architecture of major depression. *Nat. Genet.* **50**, 668–681 (2018).
- 863 103. Okbay, A. *et al.* Genetic variants associated with subjective well-being, depressive  
864 symptoms, and neuroticism identified through genome-wide analyses. *Nat. Genet.* **48**,  
865 624–633 (2016).
- 866 104. de Moor, M. H. M. *et al.* Meta-analysis of genome-wide association studies for  
867 personality. *Mol. Psychiatry* **17**, 337–49 (2012).
- 868 105. van den Berg, S. M. *et al.* Meta-analysis of genome-wide association studies for  
869 extraversion: findings from the genetics of personality consortium. *Behav. Genet.* **46**,  
870 170–82 (2016).
- 871 106. Rietveld, C. A. *et al.* Common genetic variants associated with cognitive performance  
872 identified using the proxy-phenotype method. *Proc. Natl. Acad. Sci.* **111**, 13790–  
873 13794 (2014).
- 874 107. Rietveld, C. A. *et al.* GWAS of 126,559 individuals identifies genetic variants  
875 associated with educational attainment. *Science* **340**, 1467–71 (2013).
- 876 108. Hambrook, D., Tchanturia, K., Schmidt, U., Russell, T. & Treasure, J. Empathy,  
877 systemizing, and autistic traits in anorexia nervosa: a pilot study. *Br. J. Clin. Psychol.*  
878 **47**, 335–9 (2008).

- 879 109. Russell-Smith, S. N., Bayliss, D. M., Maybery, M. T. & Tomkinson, R. L. Are the  
880 autism and positive schizotypy spectra diametrically opposed in empathizing and  
881 systemizing? *J. Autism Dev. Disord.* **43**, 695–706 (2013).
- 882 110. Courty, A. *et al.* Levels of autistic traits in anorexia nervosa: a comparative  
883 psychometric study. *BMC Psychiatry* **13**, 222 (2013).
- 884 111. Nettle, D. Empathizing and systemizing: what are they, and what do they contribute to  
885 our understanding of psychological sex differences? *Br. J. Psychol.* **98**, 237–55 (2007).
- 886 112. Wakabayashi, A. & Kawashima, H. Is empathizing in the E–S theory similar to  
887 agreeableness? The relationship between the EQ and SQ and major personality  
888 domains. *Pers. Individ. Dif.* **76**, 88–93 (2015).
- 889 113. Deary, V. *et al.* Genetic contributions to self-reported tiredness. *Mol. Psychiatry* **23**,  
890 609–620 (2018).
- 891 114. Ripke, S. *et al.* Biological insights from 108 schizophrenia-associated genetic loci.  
892 *Nature* **511**, 421–7 (2014).
- 893 115. Jones, S. E. *et al.* Genome-Wide Association Analyses in 128,266 Individuals  
894 Identifies New Morningness and Sleep Duration Loci. *PLoS Genet.* **12**, e1006125  
895 (2016).
- 896 116. Otowa, T. *et al.* Meta-analysis of genome-wide association studies of anxiety  
897 disorders. *Mol. Psychiatry* (2016). doi:10.1038/mp.2015.197
- 898 117. Mattheisen, M. *et al.* Genome-wide association study in obsessive-compulsive  
899 disorder: results from the OCGAS. *Mol. Psychiatry* **20**, 337–344 (2015).
- 900 118. International Obsessive Compulsive Disorder Foundation Genetics Collaborative  
901 (IOCDF-GC) and OCD Collaborative Genetics Association Studies (OC GAS), P. D. *et*  
902 *al.* Revealing the complex genetic architecture of obsessive-compulsive disorder using  
903 meta-analysis. *Mol. Psychiatry* **23**, 1181–1188 (2018).
- 904 119. Duncan, L. E. *et al.* Largest GWAS of PTSD (N=20,070) yields genetic overlap with  
905 schizophrenia and sex differences in heritability. *Mol. Psychiatry* **23**, 666–673 (2017).
- 906 120. Allison, C., Baron-Cohen, S., Wheelwright, S. J., Stone, M. H. & Muncer, S. J.  
907 Psychometric analysis of the Empathy Quotient (EQ). *Pers. Individ. Dif.* **51**, 829–835  
908 (2011).
- 909 121. Kok, F. M., Groen, Y., Becke, M., Fuermaier, A. B. M. & Tucha, O. Self-Reported  
910 Empathy in Adult Women with Autism Spectrum Disorders – A Systematic Mini  
911 Review. *PLoS One* **11**, e0151568 (2016).
- 912 122. Nieuwboer, H. A., Pool, R., Dolan, C. V., Boomsma, D. I. & Nivard, M. G. GWIS:  
913 Genome-Wide Inferred Statistics for functions of multiple phenotypes. *Am. J. Hum.*  
914 *Genet.* **99**, 917–927 (2016).
- 915 123. Grotzinger, A. D. *et al.* Genomic structural equation modelling provides insights into  
916 the multivariate genetic architecture of complex traits. *Nat. Hum. Behav.* **1** (2019).  
917 doi:10.1038/s41562-019-0566-x
- 918 124. Boyle, E. A., Li, Y. I. & Pritchard, J. K. An Expanded View of Complex Traits: From  
919 Polygenic to Omnigenic. *Cell* **169**, 1177–1186 (2017).
- 920 125. Yang, J., Lee, S. H., Goddard, M. E. & Visscher, P. M. GCTA: a tool for genome-wide



921 complex trait analysis. *Am. J. Hum. Genet.* **88**, 76–82 (2011).

922

## 923 **Acknowledgements**

924 We are grateful to Michel Nivard and Beate St. Pourcain for their help with the  
925 analytical methods. We thank the research participants and employees of 23andMe for  
926 making this work possible. We are grateful to all the families who took part in this study, the  
927 midwives for their help in recruiting them, and the whole ALSPAC team, which includes  
928 interviewers, computer and laboratory technicians, clerical workers, research scientists,  
929 volunteers, managers, receptionists, and nurses. VW was funded by St. John's College,  
930 Cambridge, and the Cambridge Commonwealth Trust. This study was funded by grants to  
931 SBC from the Medical Research Council, the Wellcome Trust, the Autism Research Trust,  
932 the Templeton World Charity Foundation,, and to TB from the Institut Pasteur, the CNRS,  
933 the INSERM, The Fundamental Foundation, the APHP, the BioPsy Labex and the University  
934 Paris Diderot. The research was conducted in association with the National Institute for  
935 Health Research (NIHR) Collaboration for Leadership in Applied Health Research and Care  
936 East of England at Cambridgeshire and Peterborough NHS Foundation Trust. We also  
937 received support from the NIHR Cambridge Biomedical Research Centre. We acknowledge  
938 with gratitude the generous support of Drs Dennis and Mireille Gillings in strengthening the  
939 collaboration between SBC and TB, and between Cambridge University and the Institut  
940 Pasteur. The views expressed are those of the author(s) and not necessarily those of the NHS,  
941 the NIHR or the Department of Health. Data obtained from 23andMe was supported by the  
942 National Human Genome Research Institute of the National Institutes of Health (grant  
943 number R44HG006981). The UK Medical Research Council and Wellcome (grant ref:  
944 102215/2/13/2) and the University of Bristol provide core support for ALSPAC. GWAS data  
945 was generated by Sample Logistics and Genotyping Facilities at Wellcome Sanger Institute  
946 and LabCorp (Laboratory Corporation of America) using support from 23andMe. This  
947 publication is the work of the authors who will serve as guarantors for the content of this  
948 paper. The iPSYCH (The Lundbeck Foundation Initiative for Integrative Psychiatric  
949 Research) team acknowledges funding from The Lundbeck Foundation (grant no R102-  
950 A9118 and R155-2014-1724), the Stanley Medical Research Institute, the European Research  
951 Council (project no: 294838), the Novo Nordisk Foundation for supporting the Danish  
952 National Biobank resource, and grants from Aarhus and Copenhagen Universities and  
953 University Hospitals, including support to the iSEQ Center, the GenomeDK HPC facility,  
954 and the CIRRAU Center. The project leading to this application has received funding from  
955 the Innovative Medicines Initiative 2 Joint Undertaking (JU) under grant agreement No

956 777394. The JU receives support from the European Union’s Horizon 2020 research and  
957 innovation programme and EFPIA and AUTISM SPEAKS, Autistica, SFARI. We thank the  
958 iPSCH-Broad Autism Group and the EU-AIMS LEAP group for sharing data. A full list of  
959 the authors and affiliations in the iPSYCH-Broad autism group and the EU-AIMS LEAP  
960 group is provided in the Supplementary Information.

961

## 962 **Competing interests**

963 DH and the 23andMe Research Team are employees of 23andMe, Inc. There is no conflict of  
964 interest for the other authors.

965

## 966 **Author contributions**

967 VW, TB, SBC, and DAH conceived and designed the analysis. CSL, FC, RD, WDW, JB,  
968 ADB, JG, GP, 23andMe Research Team, and DAH collected or contributed the data or  
969 analysis tools. VW, RT, HW, FC, and WDW performed the analysis. VW, RT, BC, DAH,  
970 TB, and SBC wrote the paper. DAH, TB, and SBC supervised the analysis.

971

## 972 **+23andMe Research Team**

973 Michelle Agee<sup>1</sup>, Babak Alipanahi<sup>1</sup>, Adam Auton<sup>1</sup>, Robert K. Bell<sup>1</sup>, Katarzyna Bryc<sup>1</sup>, Sarah L.  
974 Elson<sup>1</sup>, Pierre Fontanillas<sup>1</sup>, Nicholas A. Furlotte<sup>1</sup>, Karen E. Huber<sup>1</sup>, Aaron Kleinman<sup>1</sup>, Nadia  
975 K. Litterman<sup>1</sup>, Jennifer C. McCreight<sup>1</sup>, Matthew H. McIntyre<sup>1</sup>, Joanna L. Mountain<sup>1</sup>, Carrie  
976 A.M. Northover<sup>1</sup>, Steven J. Pitts<sup>1</sup>, J. Fah Sathirapongsasuti<sup>1</sup>, Olga V. Sazonova<sup>1</sup>, Janie F.  
977 Shelton<sup>1</sup>, Suyash Shringarpure<sup>1</sup>, Chao Tian<sup>1</sup>, Joyce Y. Tung<sup>1</sup>, Vladimir Vacic<sup>1</sup>, and  
978 Catherine H. Wilson<sup>1</sup>.

979 <sup>17</sup> 23andMe Inc., Mountain View, California 94043, USA

980 **Figures and figure legends**

981 **Figure 1**

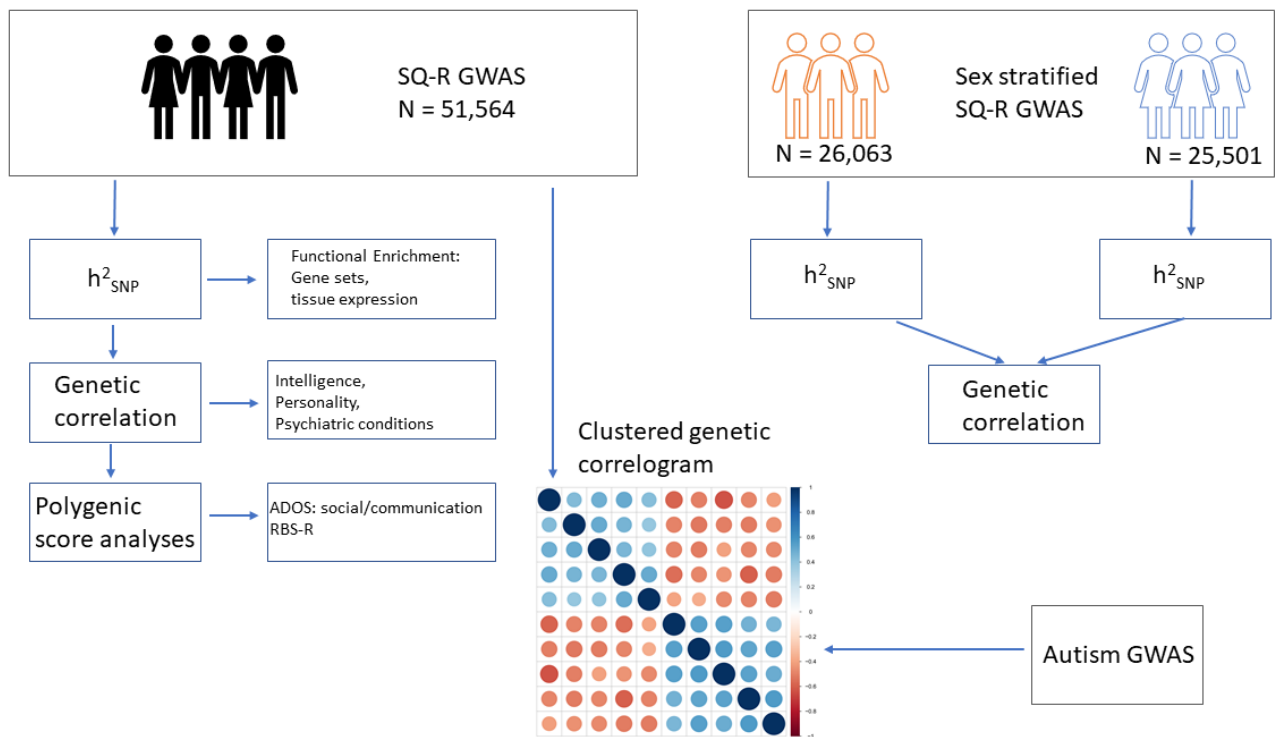

982

983 *Schematic diagram of the study. We conducted a GWAS of the SQ-R (N = 51,564) and*  
984 *quantified SNP heritability ( $h^2_{SNP}$ ), quantified genetic correlations with multiple phenotypes,*  
985 *and conducted polygenic score analyses. Additionally, we conducted sex-stratified GWAS of*  
986 *the SQ-R, and investigated  $h^2_{SNP}$  within sex and genetic correlation between sex. Finally, we*  
987 *investigated the clustering of all phenotypes that are genetically correlated with autism, and*  
988 *if the social and the non-social phenotypes associated with autism are genetically correlated.*

989

990 **Figure 2: Manhattan and QQ-plots for the three GWAS**

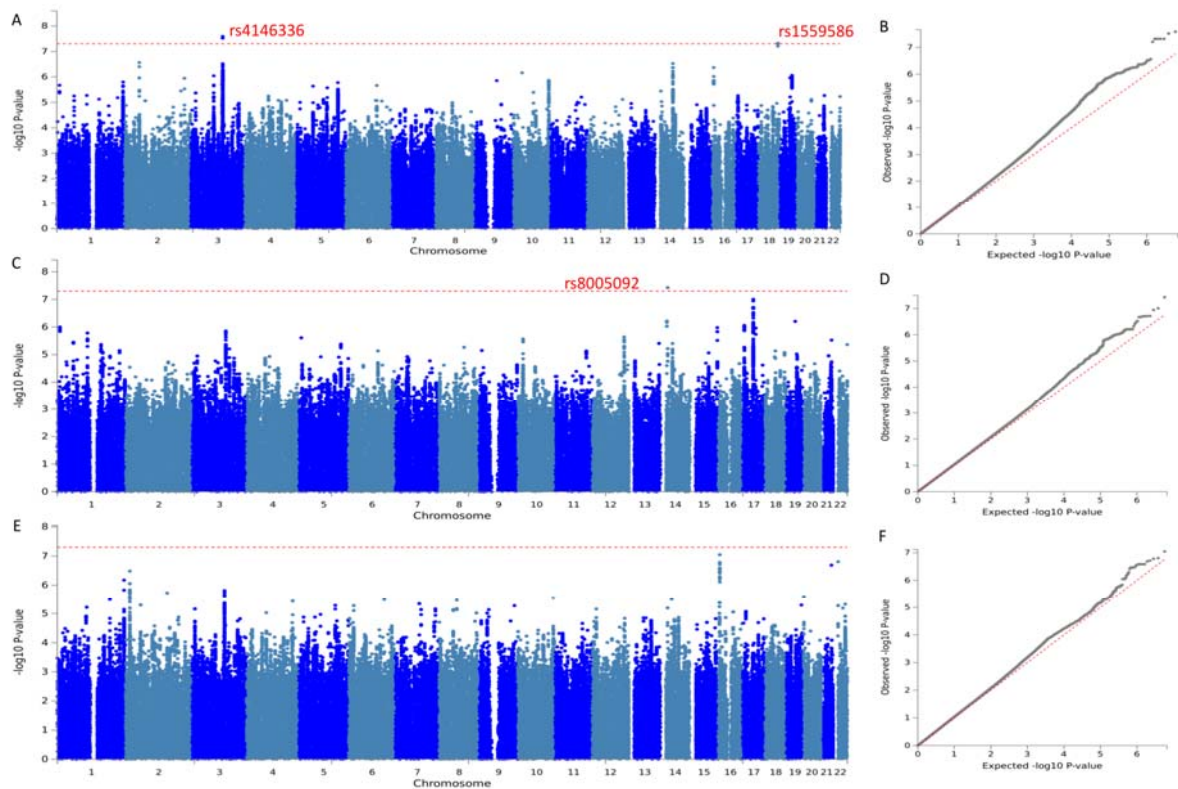

991

992 *Manhattan plot for the three SQ-R GWAS: non-stratified (A), males-only (C), females-only*  
993 *(E). Significant SNPs are highlighted in red. QQ-plots for the three SQ-R GWAS: non-*  
994 *stratified (B), males-only (D), females-only (F). SQ-R non-stratified (N = 51,564):  $\lambda_{GC} =$*   
995 *1.10, LDSR intercept = 0.99, SQ-R males only (N = 26,063):  $\lambda_{GC} = 1.06$ , LDSR intercept =*  
996 *0.99, SQ-R females only (N = 25,501):  $\lambda_{GC} = 1.05$ , LDSR intercept = 1.01.*

997 **Figure 3: Genetic correlation between the SQ-R and other phenotypes, and GWIS and**  
 998 **GSEM estimates between SQ, educational attainment and cognitive aptitude**

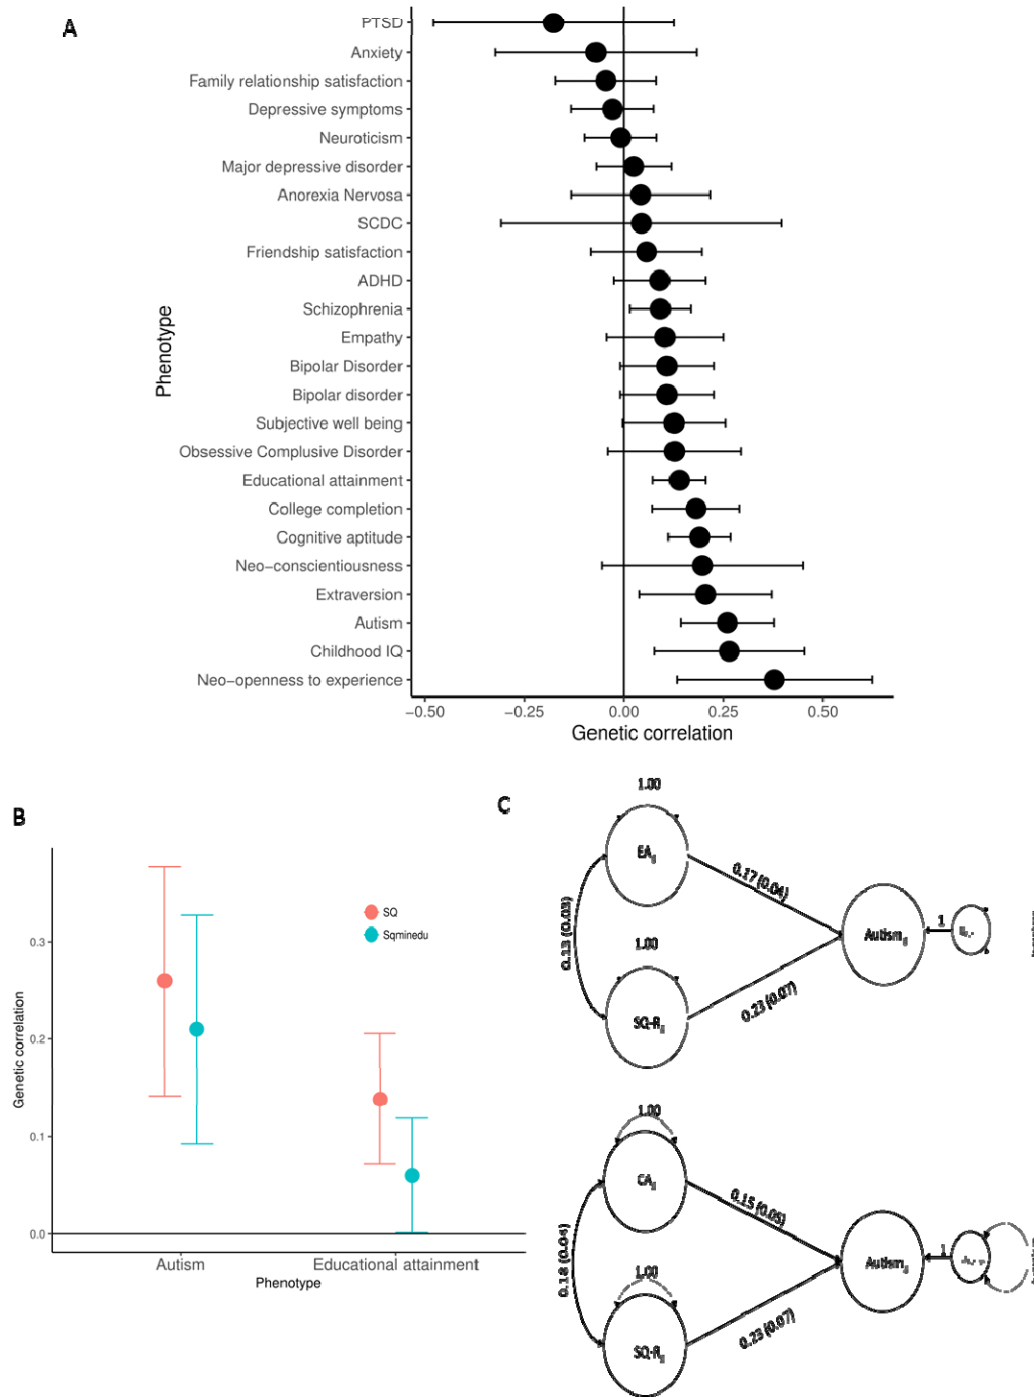

999

1000 *3A: Genetic correlations between the SQ-R and multiple other phenotypes provided. The bars*  
 1001 *represent 95% confidence intervals. Sample sizes and PMID are provided in Supplementary*  
 1002 *Table 9. The following genetic correlations were significant after Bonferroni correction:*  
 1003 *Autism ( $r_g = 0.26 \pm 0.06$ ;  $P = 3.35 \times 10^{-5}$ ,  $N = 46,350$ ), Years of Schooling 2016 ( $r_g =$*   
 1004  *$0.13 \pm 0.03$ ;  $P = 4.73 \times 10^{-5}$ ,  $N = 293,723$ ), College completion ( $r_g = 0.18 \pm 0.05$ ;  $P = 1.30 \times 10^{-3}$ ,*  
 1005  *$N = 95427$ ), and Cognitive aptitude ( $r_g = 0.19 \pm 0.04$ ;  $P = 2.35 \times 10^{-5}$ ,  $N = 78,308$ ). 3B: Results*



1006 *of the GWIS analysis. Red lines represent genetic correlation with the SQ-R, blue lines*  
1007 *represent genetic correlations with the SQ-R independent of the genetic effects of educational*  
1008 *attainment. The bars represent 95% confidence intervals. 3C: Path diagrams providing the*  
1009 *results of the standardized SEM models to investigate if the SQ-R is genetically correlated*  
1010 *with autism independent of the genetic effects of cognitive aptitude ( $CA_g$ ) and educational*  
1011 *attainment ( $EA_g$ ).GWIS is Genome-wide inferred statistics; GSEM is Genomic structural*  
1012 *equation modeling.*

1013 **Figure 4: Genetic correlogram of autism and related traits, and genetic correlations**  
 1014 **between social and non-social traits and multiple psychiatric conditions**

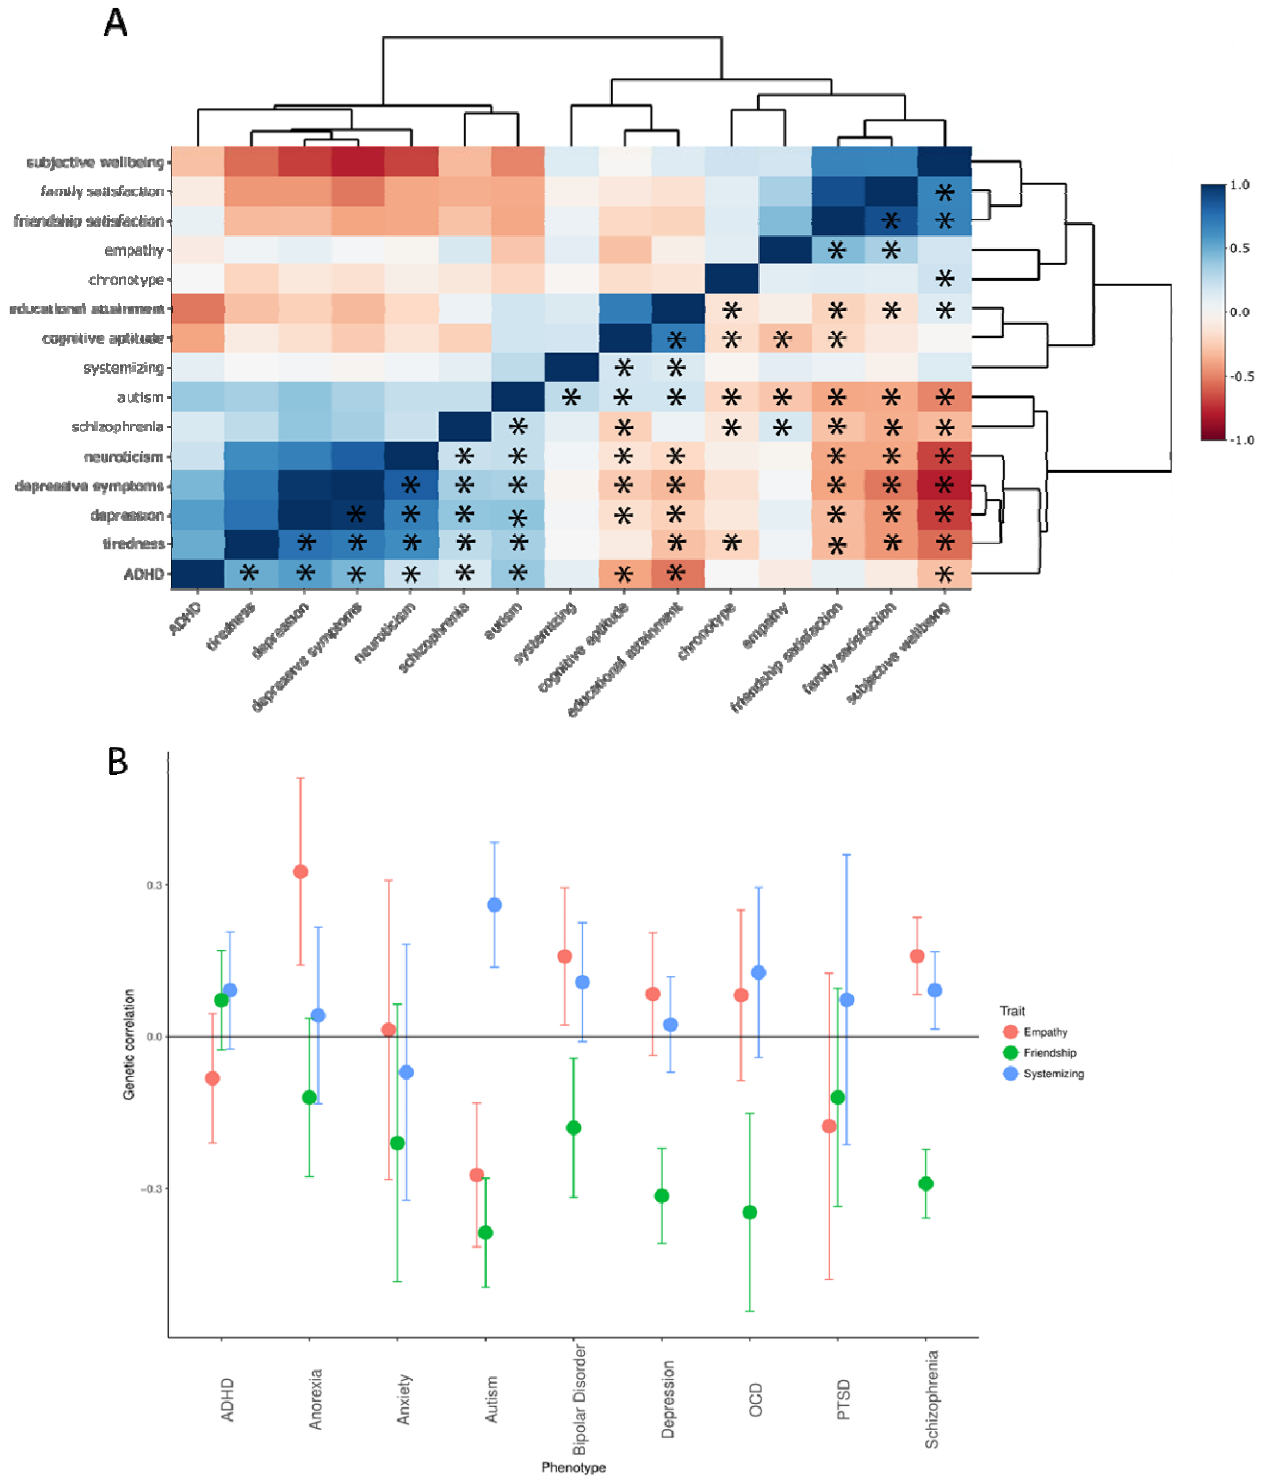

1015

1016 *4A: Correlogram of genetic correlations between all phenotypes that are genetically*  
 1017 *correlated with autism. Please note the upper and lower triangle are identical. Asterisk*  
 1018 *(provided only in the lower triangle) represent significant correlations after Bonferroni*

1019 *correction. Genetic correlations have been clustered using hierarchical clustering. Colour as*  
1020 *provides the magnitude of genetic correlation. 4B: Genetic correlation between empathy,*  
1021 *friendship satisfaction, and systemizing with nine psychiatric conditions. Only autism was*  
1022 *significantly genetically correlated with all three phenotypes.*

1023

1024
